# Supplementary material for: Comprehensive Identification of Drought Tolerance QTL-Allele and Candidate Gene Systems in Chinese Cultivated Soybean Population
Source: PubMed Central journal article supplement (PMC7402128; doi:10.3390/ijms21144830), 2020-07-08
Supplement: ijms-21-04830-s001.pdf [file ijms-21-04830-s001.pdf]

## Supplementary Tables

**Table S1.** Highly drought-tolerant and highly drought-sensitive accessions in the CCSP.

| Code                                      | Province       | Eco-Region | Variety Type | MPW           | MPH           |
|-------------------------------------------|----------------|------------|--------------|---------------|---------------|
| <u>Highly drought-tolerant accession</u>  |                |            |              |               |               |
| N25258                                    | Jilin          | I          | RC           | 1.411         | 1.712         |
| N25340                                    | Shandong       | II         | RC           | 1.223         | 1.439         |
| N09580                                    | Shandong       | II         | RC           | 0.933         | 1.568         |
| N08276                                    | Jiangxi        | IV         | LR           | 0.849         | 1.576         |
| N21043                                    | Jiangxi        | IV         | LR           | 0.653         | 1.656         |
| N21222                                    | Anhui          | II         | LR           | 0.545         | 1.792         |
| N08814                                    | Liaoning       | I          | RC           | 0.673         | 1.513         |
| <b>N21175</b>                             | <b>Jiangsu</b> | <b>III</b> | <b>LR</b>    | <b>1.071</b>  | <b>1.168</b>  |
| <b>N24614</b>                             | <b>Hunan</b>   | <b>III</b> | <b>LR</b>    | <b>1.005</b>  | <b>1.668</b>  |
| <b>N04650</b>                             | <b>Sichuan</b> | <b>IV</b>  | <b>LR</b>    | <b>0.988</b>  | <b>0.110</b>  |
| <b>N02549</b>                             | <b>Guizhou</b> | <b>V</b>   | <b>LR</b>    | <b>0.971</b>  | <b>1.546</b>  |
| <b>N23583</b>                             | <b>Gansu</b>   | <b>II</b>  | <b>LR</b>    | <b>0.965</b>  | <b>0.508</b>  |
| <u>Highly drought-sensitive accession</u> |                |            |              |               |               |
| N23716                                    | Beijing        | II         | RC           | -0.033        | -1.214        |
| N00710                                    | Fujian         | IV         | LR           | 0.098         | -1.323        |
| N25174                                    | Henan          | II         | RC           | -0.201        | -0.995        |
| N24280                                    | Liaoning       | I          | LR           | -0.163        | -0.925        |
| N04436                                    | Jiangxi        | IV         | LR           | 0.135         | -1.240        |
| N25261                                    | Jilin          | I          | RC           | -0.205        | -0.870        |
| N05433                                    | Guangdong      | VI         | LR           | -0.084        | -0.907        |
| <b>N25245</b>                             | <b>Jilin</b>   | <b>I</b>   | <b>RC</b>    | <b>-0.026</b> | <b>-0.234</b> |
| <b>N02840</b>                             | <b>Shanxi</b>  | <b>II</b>  | <b>LR</b>    | <b>0.000</b>  | <b>-0.556</b> |
| <b>N25415</b>                             | <b>Hunan</b>   | <b>IV</b>  | <b>RC</b>    | <b>0.002</b>  | <b>0.133</b>  |
| <b>N05410</b>                             | <b>Guangxi</b> | <b>VI</b>  | <b>LR</b>    | <b>0.008</b>  | <b>-0.258</b> |
| <b>N23544</b>                             | <b>Jilin</b>   | <b>I</b>   | <b>LR</b>    | <b>0.016</b>  | <b>0.915</b>  |

CCSP is the Chinese cultivated soybean germplasm population; LRS and RCS are the landrace subpopulation and released cultivar subpopulation, respectively. The five highly drought tolerant accessions and five highly drought sensitive ones used as checks to calculate membership index value are in boldface. Eco-region: I: Northern single cropping, spring planting eco-region; II: Huanghuaihai double cropping, spring and summer planting eco-region; III: Middle and lower Changjiang valley double cropping, spring and summer planting eco-region; IV: Central south multiple cropping, spring, summer and autumn planting eco-region; and VI: South China tropical multiple cropping, all-season planting eco-region. MPW and MPH represent the membership indices of plant weight and plant height, respectively.

**Table S2.** The positions of QTL conferring drought tolerance in CCSP.

| QTL        | SNPLDB        | Position          | QTL        | SNPLDB        | Position          |
|------------|---------------|-------------------|------------|---------------|-------------------|
| <u>MPW</u> |               |                   | <u>MPH</u> |               |                   |
| MPW1.1     | Gm01_149527   | 149527            | MPH1.1     | Gm01_BLOCK493 | 47264933_47293823 |
| MPW1.2     | Gm01_3646943  | 3646943           | MPH1.2     | Gm01_BLOCK546 | 51109836_51114441 |
| MPW2.1     | Gm02_BLOCK81  | 6273618_6448949   | MPH2.1     | Gm02_161337   | 161337            |
| MPW2.2     | Gm02_14594196 | 14594196          | MPH2.2     | Gm02_BLOCK299 | 26925431_26940852 |
| MPW2.3     | Gm02_29143788 | 29143788          | MPH2.3     | Gm02_50652770 | 50652770          |
| MPW2.4     | Gm02_BLOCK579 | 50037068_50084304 | MPH4.1     | Gm04_BLOCK232 | 17899360_18006649 |
| MPW3.1     | Gm03_326463   | 326463            | MPH4.2     | Gm04_BLOCK490 | 39059520_39224224 |
| MPW3.2     | Gm03_BLOCK11  | 682776_682932     | MPH4.3     | Gm04_43717074 | 43717074          |
| MPW3.3     | Gm03_993540   | 993540            | MPH4.4     | Gm04_47582011 | 47582011          |
| MPW3.4     | Gm03_BLOCK283 | 27441939_27532289 | MPH5.1     | Gm05_10333534 | 10333534          |
| MPW4.1     | Gm04_10567695 | 10567695          | MPH5.2     | Gm05_18374832 | 18374832          |
| MPW4.2     | Gm04_BLOCK295 | 23842345_23898799 | MPH6.1     | Gm06_BLOCK172 | 15431276_15435935 |
| MPW5.1     | Gm05_18374832 | 18374832          | MPH6.2     | Gm06_BLOCK208 | 18122798_18288672 |
| MPW5.2     | Gm05_20554448 | 20554448          | MPH6.3     | Gm06_34868214 | 34868214          |
| MPW5.3     | Gm05_33077723 | 33077723          | MPH6.4     | Gm06_BLOCK491 | 43295770_43445956 |
| MPW6.1     | Gm06_BLOCK201 | 17499686_17547717 | MPH6.5     | Gm06_BLOCK576 | 49809899_49810066 |
| MPW6.2     | Gm06_BLOCK264 | 22103834_22103856 | MPH7.1     | Gm07_BLOCK25  | 2596793_2621710   |
| MPW6.3     | Gm06_BLOCK401 | 37416804_37534374 | MPH7.2     | Gm07_16348924 | 16348924          |
| MPW6.4     | Gm06_BLOCK522 | 45336128_45364730 | MPH7.3     | Gm07_BLOCK194 | 18099542_18115758 |
| MPW6.5     | Gm06_BLOCK576 | 49809899_49810066 | MPH7.4     | Gm07_BLOCK272 | 26276821_26276947 |
| MPW7.1     | Gm07_3177189  | 3177189           | MPH7.5     | Gm07_30175006 | 30175006          |
| MPW7.2     | Gm07_BLOCK229 | 21443464_21515277 | MPH7.6     | Gm07_32919498 | 32919498          |
| MPW7.3     | Gm07_BLOCK302 | 30203444_30235313 | MPH7.7     | Gm07_42499533 | 42499533          |
| MPW7.4     | Gm07_BLOCK373 | 36845443_36846591 | MPH8.1     | Gm08_BLOCK106 | 10280416_10330725 |
| MPW8.1     | Gm08_BLOCK49  | 4919887_4920152   | MPH8.2     | Gm08_BLOCK250 | 22171249_22184601 |
| MPW8.2     | Gm08_BLOCK71  | 7235499_7260878   | MPH8.3     | Gm08_28738663 | 28738663          |
| MPW8.3     | Gm08_11056573 | 11056573          | MPH8.4     | Gm08_30916483 | 30916483          |
| MPW8.4     | Gm08_BLOCK165 | 16183060_16183086 | MPH8.5     | Gm08_BLOCK466 | 40018947_40100361 |
| MPW8.5     | Gm08_BLOCK209 | 18538004_18538077 | MPH9.1     | Gm09_4538598  | 4538598           |
| MPW8.6     | Gm08_BLOCK466 | 40018947_40100361 | MPH9.2     | Gm09_14134401 | 14134401          |
| MPW8.7     | Gm08_BLOCK527 | 44688033_44689115 | MPH9.3     | Gm09_20590481 | 20590481          |
| MPW9.1     | Gm09_963514   | 963514            | MPH9.4     | Gm09_37359880 | 37359880          |
| MPW9.2     | Gm09_2378279  | 2378279           | MPH9.5     | Gm09_41866356 | 41866356          |
| MPW9.3     | Gm09_BLOCK115 | 8621107_8819963   | MPH11.1    | Gm11_BLOCK74  | 6486267_6486274   |
| MPW9.4     | Gm09_BLOCK142 | 11337674_11393438 | MPH11.2    | Gm11_BLOCK135 | 12344649_12534077 |
| MPW9.5     | Gm09_35353845 | 35353845          | MPH11.3    | Gm11_27967762 | 27967762          |
| MPW9.6     | Gm09_36608762 | 36608762          | MPH11.4    | Gm11_BLOCK344 | 30564343_30628745 |
| MPW10.1    | Gm10_BLOCK71  | 5491148_5560788   | MPH12.1    | Gm12_32591630 | 32591630          |
| MPW10.2    | Gm10_BLOCK96  | 7026382_7036759   | MPH13.1    | Gm13_10222518 | 10222518          |
| MPW10.3    | Gm10_BLOCK159 | 12053290_12110973 | MPH13.2    | Gm13_BLOCK177 | 12726894_12922852 |
| MPW10.4    | Gm10_BLOCK229 | 20348469_20509845 | MPH13.3    | Gm13_23309035 | 23309035          |
| MPW10.5    | Gm10_38212261 | 38212261          | MPH13.4    | Gm13_28457573 | 28457573          |
| MPW11.1    | Gm11_BLOCK126 | 11286334_11300481 | MPH13.5    | Gm13_BLOCK396 | 32853739_32853960 |
| MPW11.2    | Gm11_17784579 | 17784579          | MPH14.1    | Gm14_3106285  | 3106285           |
| MPW11.3    | Gm11_BLOCK216 | 19260997_19456210 | MPH14.2    | Gm14_25589678 | 25589678          |
| MPW11.4    | Gm11_BLOCK241 | 21939990_22028918 | MPH14.3    | Gm14_BLOCK408 | 32922809_33122741 |
| MPW11.5    | Gm11_26892595 | 26892595          | MPH15.1    | Gm15_BLOCK240 | 20265788_20347922 |
| MPW12.1    | Gm12_8508827  | 8508827           | MPH15.2    | Gm15_31242502 | 31242502          |
| MPW12.2    | Gm12_BLOCK254 | 21639072_21792597 | MPH15.3    | Gm15_BLOCK383 | 33379981_33579667 |
| MPW12.3    | Gm12_BLOCK402 | 34418573_34433816 | MPH16.1    | Gm16_BLOCK67  | 6115682_6115697   |
| MPW12.4    | Gm12_BLOCK429 | 36325875_36326233 | MPH16.2    | Gm16_BLOCK395 | 35357235_35358822 |
| MPW13.1    | Gm13_2179313  | 2179313           | MPH18.1    | Gm18_4912699  | 4912699           |
| MPW13.2    | Gm13_BLOCK338 | 28533415_28666500 | MPH18.2    | Gm18_7175261  | 7175261           |
| MPW13.3    | Gm13_BLOCK486 | 40737493_40748440 | MPH18.3    | Gm18_BLOCK129 | 9691839_9691905   |
| MPW14.1    | Gm14_39515432 | 39515432          | MPH18.4    | Gm18_26517331 | 26517331          |

| QTL     | SNPLDB        | Position          | QTL     | SNPLDB        | Position          |
|---------|---------------|-------------------|---------|---------------|-------------------|
| MPW15.1 | Gm15_2915560  | 2915560           | MPH18.5 | Gm18_BLOCK434 | 39409732_39410305 |
| MPW15.2 | Gm15_BLOCK93  | 10005107_10092800 | MPH18.6 | Gm18_BLOCK727 | 60984735_60985531 |
| MPW15.3 | Gm15_30923425 | 30923425          | MPH18.7 | Gm18_BLOCK729 | 61046143_61063972 |
| MPW15.4 | Gm15_BLOCK409 | 36255072_36454998 | MPH19.1 | Gm19_37391411 | 37391411          |
| MPW16.1 | Gm16_2912151  | 2912151           | MPH19.2 | Gm19_41440516 | 41440516          |
| MPW16.2 | Gm16_7534785  | 7534785           | MPH19.3 | Gm19_42142070 | 42142070          |
| MPW16.3 | Gm16_BLOCK365 | 31363301_31363322 | MPH19.4 | Gm19_42756453 | 42756453          |
| MPW17.1 | Gm17_BLOCK344 | 32699950_32806483 | MPH20.1 | Gm20_BLOCK388 | 33593168_33630697 |
| MPW17.2 | Gm17_BLOCK388 | 35788429_35788495 | MPH20.2 | Gm20_39658098 | 39658098          |
| MPW18.1 | Gm18_BLOCK736 | 61478767_61495577 | Total   | 64            |                   |
| MPW19.1 | Gm19_45043655 | 45043655          |         |               |                   |
| MPW19.2 | Gm19_BLOCK554 | 45721471_45729322 |         |               |                   |
| MPW19.3 | Gm19_46882319 | 46882319          |         |               |                   |
| MPW20.1 | Gm20_6329124  | 6329124           |         |               |                   |
| MPW20.2 | Gm20_BLOCK210 | 17219843_17346621 |         |               |                   |
| MPW20.3 | Gm20_BLOCK429 | 36186946_36187233 |         |               |                   |
| MPW20.4 | Gm20_BLOCK468 | 38753573_38753583 |         |               |                   |
| MPW20.5 | Gm20_39658098 | 39658098          |         |               |                   |
| MPW20.6 | Gm20_41737971 | 41737971          |         |               |                   |
| MPW20.7 | Gm20_BLOCK531 | 44594152_44673992 |         |               |                   |
| Total   | 75            |                   |         |               |                   |

MPW and MPH represent the membership index values of relative plant weight and plant height, respectively. SNPLDB, SNP linkage disequilibrium block. Position, the physical position of SNPLDB according to the reference genome of Glyma.Wm82.a1.v1.1.

**Table S3.** The allele frequency of the landrace subpopulation (LRS) and the released cultivar subpopulation (RCS) on the 87 differentiated loci.

| SNPLDB        | Trait  | Allele | Effect | CCSP  | LRS   | RCS   | SNPLDB        | Trait  | Allele        | Effect | CCSP          | LRS    | RCS   |       |       |
|---------------|--------|--------|--------|-------|-------|-------|---------------|--------|---------------|--------|---------------|--------|-------|-------|-------|
| Gm01_BLOCK493 | MPH    | a1     | -0.384 | 0.885 | 0.912 | 0.849 | Gm10_BLOCK159 | MPW    | a1            | 0.076  | 0.580         | 0.693  | 0.433 |       |       |
|               |        | a2     | -0.360 | 0.067 | 0.022 | 0.127 |               |        | a2            | 0.055  | 0.230         | 0.154  | 0.331 |       |       |
|               |        | a3     | -0.360 | 0.046 | 0.066 | 0.020 |               |        | a3            | 0.105  | 0.067         | 0.060  | 0.078 |       |       |
|               |        | a4     | 1.103  | 0.002 | 0.000 | 0.004 |               |        | a4            | 0.111  | 0.066         | 0.041  | 0.098 |       |       |
| Gm01_BLOCK546 | MPH    | a1     | 0.116  | 0.849 | 0.850 | 0.849 | a5            | -0.049 | 0.050         | 0.047  | 0.053         |        |       |       |       |
|               |        | a3     | 0.142  | 0.131 | 0.119 | 0.147 | a6            | -0.009 | 0.005         | 0.003  | 0.008         |        |       |       |       |
|               |        | a2     | -0.258 | 0.020 | 0.031 | 0.004 | a7            | -0.290 | 0.002         | 0.003  | 0.000         |        |       |       |       |
| Gm02_BLOCK81  | MPW    | a1     | 0.021  | 0.505 | 0.549 | 0.449 | Gm10_BLOCK229 | MPW    | a1            | -0.129 | 0.621         | 0.734  | 0.473 |       |       |
|               |        | a2     | 0.037  | 0.310 | 0.317 | 0.302 |               |        | a2            | -0.604 | 0.129         | 0.094  | 0.176 |       |       |
|               |        | a3     | -0.013 | 0.089 | 0.078 | 0.102 |               |        | a3            | -0.069 | 0.115         | 0.113  | 0.118 |       |       |
|               |        | a4     | -0.025 | 0.046 | 0.006 | 0.098 |               |        | a4            | -0.074 | 0.087         | 0.031  | 0.159 |       |       |
|               |        | a5     | 0.164  | 0.028 | 0.019 | 0.041 |               |        | a5            | -0.197 | 0.035         | 0.006  | 0.073 |       |       |
|               |        | a6     | 0.045  | 0.018 | 0.028 | 0.004 |               |        | a6            | 0.365  | 0.009         | 0.016  | 0.000 |       |       |
|               |        | a7     | -0.229 | 0.004 | 0.003 | 0.004 |               |        | a7            | 0.005  | 0.002         | 0.003  | 0.000 |       |       |
| Gm02_14594196 | MPW    | G      | -0.082 | 0.959 | 0.931 | 0.996 | Gm10_38212261 | MPW    | a8            | 0.712  | 0.002         | 0.003  | 0.000 |       |       |
|               |        | A      | 0.082  | 0.041 | 0.069 | 0.004 |               |        | G             | 0.038  | 0.855         | 0.824  | 0.894 |       |       |
| Gm02_BLOCK299 | MPH    | a1     | -0.060 | 0.810 | 0.793 | 0.833 | Gm11_BLOCK126 | MPW    | A             | -0.038 | 0.145         | 0.176  | 0.106 |       |       |
|               |        | a2     | 0.485  | 0.129 | 0.103 | 0.163 |               |        | a1            | -0.041 | 0.392         | 0.323  | 0.482 |       |       |
|               |        | a3     | 0.118  | 0.032 | 0.053 | 0.004 |               |        | a2            | -0.035 | 0.365         | 0.505  | 0.184 |       |       |
|               |        | a4     | 0.098  | 0.023 | 0.041 | 0.000 |               |        | a3            | -0.068 | 0.225         | 0.147  | 0.327 |       |       |
| Gm02_BLOCK579 | MPW    | a5     | -0.641 | 0.005 | 0.009 | 0.000 | a4            | 0.743  | 0.018         | 0.025  | 0.008         |        |       |       |       |
|               |        | a1     | 0.158  | 0.745 | 0.715 | 0.784 | Gm11_BLOCK135 | MPH    | a1            | -0.287 | 0.569         | 0.536  | 0.612 |       |       |
|               |        | a2     | 0.146  | 0.144 | 0.135 | 0.155 |               |        | a2            | -0.205 | 0.367         | 0.364  | 0.371 |       |       |
|               |        | a3     | 0.176  | 0.096 | 0.122 | 0.061 |               |        | a3            | -0.204 | 0.037         | 0.056  | 0.012 |       |       |
|               |        | a4     | -0.100 | 0.012 | 0.022 | 0.000 |               |        | a4            | 0.058  | 0.025         | 0.041  | 0.004 |       |       |
| a5            | -0.379 | 0.004  | 0.006  | 0.000 | a5    | 0.639 |               |        | 0.002         | 0.003  | 0.000         |        |       |       |       |
| Gm03_993540   | MPW    | C      | 0.079  | 0.883 | 0.831 | 0.951 | Gm11_BLOCK216 | MPW    | a1            | -0.206 | 0.716         | 0.596  | 0.873 |       |       |
|               |        | A      | -0.079 | 0.117 | 0.169 | 0.049 |               |        | a2            | -0.272 | 0.188         | 0.260  | 0.094 |       |       |
| Gm03_BLOCK283 | MPW    | a1     | 0.052  | 0.360 | 0.348 | 0.376 | Gm11_BLOCK241 | MPW    | a3            | -0.213 | 0.092         | 0.141  | 0.029 |       |       |
|               |        | a2     | 0.058  | 0.300 | 0.270 | 0.339 |               |        | a4            | 0.735  | 0.002         | 0.003  | 0.000 |       |       |
|               |        | a3     | 0.110  | 0.129 | 0.119 | 0.143 |               |        | a5            | -0.044 | 0.002         | 0.000  | 0.004 |       |       |
|               |        | a4     | 0.090  | 0.067 | 0.069 | 0.065 |               |        | a1            | 0.015  | 0.649         | 0.492  | 0.853 |       |       |
|               |        | a5     | 0.024  | 0.060 | 0.097 | 0.012 |               |        | a2            | 0.054  | 0.278         | 0.398  | 0.122 |       |       |
|               |        | a6     | 0.071  | 0.044 | 0.031 | 0.061 |               |        | a3            | -0.069 | 0.073         | 0.110  | 0.024 |       |       |
|               |        | a7     | 0.004  | 0.028 | 0.050 | 0.000 |               |        | Gm11_27967762 | MPH    | C             | -0.087 | 0.949 | 0.931 | 0.971 |
|               |        | a8     | 0.171  | 0.007 | 0.013 | 0.004 |               |        |               |        | T             | 0.087  | 0.051 | 0.069 | 0.029 |
|               |        | a9     | -0.579 | 0.004 | 0.003 | 0.000 |               |        |               |        | a1            | 0.021  | 0.883 | 0.818 | 0.967 |
| Gm04_10567695 | MPW    | C      | -0.173 | 0.980 | 0.994 | 0.963 | Gm11_BLOCK344 | MPH    | a2            | -0.117 | 0.074         | 0.113  | 0.024 |       |       |
|               |        | T      | 0.173  | 0.020 | 0.006 | 0.037 |               |        | a3            | 0.096  | 0.043         | 0.069  | 0.008 |       |       |
| Gm04_BLOCK232 | MPH    | a1     | 0.145  | 0.741 | 0.668 | 0.837 | Gm12_8508827  | MPW    | T             | -0.026 | 0.715         | 0.790  | 0.616 |       |       |
|               |        | a2     | 0.080  | 0.142 | 0.191 | 0.078 |               |        | G             | 0.026  | 0.285         | 0.210  | 0.384 |       |       |
|               |        | a3     | 0.286  | 0.066 | 0.094 | 0.029 |               |        | Gm12_BLOCK254 | MPW    | a1            | 0.059  | 0.888 | 0.915 | 0.853 |
|               |        | a4     | 0.379  | 0.025 | 0.034 | 0.012 |               |        |               |        | a2            | 0.147  | 0.043 | 0.016 | 0.078 |
|               |        | a5     | 0.005  | 0.021 | 0.006 | 0.041 |               |        |               |        | a3            | -0.053 | 0.041 | 0.019 | 0.069 |
|               |        | a6     | -1.516 | 0.002 | 0.000 | 0.004 |               |        |               |        | a4            | 0.014  | 0.023 | 0.041 | 0.000 |
|               |        | a7     | 0.812  | 0.002 | 0.003 | 0.000 |               |        |               |        | a5            | -0.167 | 0.005 | 0.009 | 0.000 |
|               |        | a8     | -0.191 | 0.002 | 0.003 | 0.000 |               |        |               |        | Gm12_BLOCK402 | MPW    | a1    | 0.019 | 0.844 |
| Gm04_BLOCK295 | MPW    | a1     | 0.054  | 0.759 | 0.683 | 0.857 | a2            | 0.077  |               |        |               |        | 0.115 | 0.100 | 0.135 |
|               |        | a2     | -0.022 | 0.094 | 0.132 | 0.045 | a3            | -0.096 |               |        | 0.041         | 0.013  | 0.078 |       |       |
|               |        | a3     | -0.064 | 0.083 | 0.097 | 0.065 | Gm12_BLOCK429 | MPW    | a1            | -0.070 | 0.566         | 0.489  | 0.665 |       |       |
|               |        | a4     | -0.123 | 0.043 | 0.056 | 0.024 |               |        | a2            | -0.011 | 0.284         | 0.339  | 0.212 |       |       |
|               |        | a5     | 0.154  | 0.021 | 0.031 | 0.008 |               |        | a3            | 0.081  | 0.151         | 0.172  | 0.122 |       |       |
| Gm04_BLOCK490 | MPH    | a1     | 0.071  | 0.433 | 0.464 | 0.392 | Gm13_BLOCK177 | MPH    | a1            | -0.059 | 0.456         | 0.530  | 0.359 |       |       |
|               |        | a2     | 0.115  | 0.199 | 0.235 | 0.151 |               |        | a2            | -0.139 | 0.183         | 0.160  | 0.212 |       |       |
|               |        | a3     | 0.009  | 0.145 | 0.088 | 0.220 |               |        | a3            | -0.891 | 0.126         | 0.100  | 0.159 |       |       |
|               |        | a4     | -0.172 | 0.140 | 0.100 | 0.192 |               |        | a4            | -0.021 | 0.085         | 0.013  | 0.180 |       |       |
|               |        | a5     | 0.142  | 0.069 | 0.100 | 0.029 |               |        | a5            | 0.075  | 0.074         | 0.078  | 0.069 |       |       |
|               |        | a6     | 0.027  | 0.009 | 0.013 | 0.004 |               |        | a6            | -0.201 | 0.062         | 0.100  | 0.012 |       |       |
|               |        | a7     | -0.191 | 0.005 | 0.000 | 0.012 |               |        | a7            | 0.298  | 0.011         | 0.013  | 0.008 |       |       |
| Gm04_47582011 | MPH    | T      | 0.203  | 0.970 | 0.953 | 0.992 | Gm13_28457573 | MPH    | a8            | 0.938  | 0.004         | 0.006  | 0.000 |       |       |
|               |        | G      | -0.203 | 0.030 | 0.047 | 0.008 |               |        | T             | -0.103 | 0.963         | 0.940  | 0.992 |       |       |
| Gm05_33077723 | MPW    | C      | -0.065 | 0.949 | 0.991 | 0.894 | G             | 0.103  | 0.037         | 0.060  | 0.008         |        |       |       |       |

| SNPLDB        | Trait  | Allele        | Effect | CCSP  | LRS    | RCS    | SNPLDB        | Trait  | Allele        | Effect | CCSP          | LRS    | RCS   |       |       |
|---------------|--------|---------------|--------|-------|--------|--------|---------------|--------|---------------|--------|---------------|--------|-------|-------|-------|
| Gm06_BLOCK201 | MPW    | T             | 0.065  | 0.051 | 0.009  | 0.106  | Gm13_BLOCK338 | MPW    | a1            | -0.018 | 0.583         | 0.693  | 0.441 |       |       |
|               |        | a1            | 0.038  | 0.679 | 0.633  | 0.739  |               |        | a2            | -0.134 | 0.207         | 0.034  | 0.433 |       |       |
|               |        | a2            | 0.096  | 0.152 | 0.088  | 0.237  |               |        | a3            | -0.031 | 0.076         | 0.091  | 0.057 |       |       |
|               |        | a3            | 0.034  | 0.113 | 0.188  | 0.016  |               |        | a4            | -0.027 | 0.074         | 0.097  | 0.045 |       |       |
|               |        | a4            | -0.168 | 0.055 | 0.091  | 0.008  |               |        | a5            | 0.227  | 0.053         | 0.082  | 0.016 |       |       |
| Gm06_BLOCK208 | MPH    | a1            | 0.198  | 0.434 | 0.426  | 0.445  | Gm13_BLOCK396 | MPH    | a6            | -0.017 | 0.005         | 0.003  | 0.008 |       |       |
|               |        | a2            | 0.144  | 0.262 | 0.138  | 0.424  |               |        | a1            | 0.101  | 0.915         | 0.859  | 0.988 |       |       |
|               |        | a3            | -0.013 | 0.190 | 0.257  | 0.102  | Gm14_3106285  | MPH    | a2            | -0.101 | 0.085         | 0.141  | 0.012 |       |       |
|               |        | a4            | -0.100 | 0.078 | 0.116  | 0.029  |               |        | T             | -0.101 | 0.949         | 0.918  | 0.988 |       |       |
|               |        | a5            | 0.243  | 0.027 | 0.047  | 0.000  |               |        | C             | 0.101  | 0.051         | 0.082  | 0.012 |       |       |
|               |        | Gm06_34868214 | MPH    | a6    | -0.124 | 0.007  | 0.013         | 0.000  | Gm14_BLOCK408 | MPH    | a1            | 0.010  | 0.746 | 0.743 | 0.751 |
|               |        |               |        | a7    | -0.347 | 0.002  | 0.003         | 0.000  |               |        | a2            | 0.164  | 0.197 | 0.172 | 0.229 |
| G             | -0.124 |               |        | 0.968 | 0.947  | 0.996  | a3            | 0.235  |               |        | 0.027         | 0.047  | 0.000 |       |       |
| A             | 0.124  |               |        | 0.032 | 0.053  | 0.004  | a4            | 0.170  |               |        | 0.021         | 0.022  | 0.020 |       |       |
| a1            | -0.059 |               |        | 0.622 | 0.520  | 0.755  | a5            | -0.588 |               |        | 0.007         | 0.013  | 0.000 |       |       |
| Gm06_BLOCK401 | MPW    | a2            | -0.093 | 0.113 | 0.075  | 0.163  | Gm15_BLOCK93  | MPW    | a6            | 0.009  | 0.002         | 0.003  | 0.000 |       |       |
|               |        | a3            | 0.082  | 0.090 | 0.138  | 0.029  |               |        | a1            | 0.004  | 0.807         | 0.727  | 0.910 |       |       |
|               |        | a4            | 0.018  | 0.082 | 0.141  | 0.004  |               |        | a2            | -0.083 | 0.176         | 0.241  | 0.090 |       |       |
|               |        | a5            | -0.004 | 0.046 | 0.060  | 0.029  |               |        | a3            | 0.079  | 0.018         | 0.031  | 0.000 |       |       |
|               |        | a6            | 0.056  | 0.046 | 0.066  | 0.020  |               |        | Gm15_BLOCK240 | MPH    | a1            | -0.047 | 0.468 | 0.386 | 0.576 |
|               |        | a1            | 0.050  | 0.514 | 0.417  | 0.641  |               |        |               |        | a2            | 0.073  | 0.309 | 0.301 | 0.318 |
| Gm06_BLOCK491 | MPH    | a2            | -0.175 | 0.193 | 0.266  | 0.098  | Gm15_30923425 | MPW    | a3            | 0.440  | 0.183         | 0.276  | 0.061 |       |       |
|               |        | a3            | 0.625  | 0.105 | 0.138  | 0.061  |               |        | a4            | -0.409 | 0.035         | 0.028  | 0.045 |       |       |
|               |        | a4            | -0.147 | 0.069 | 0.025  | 0.127  |               |        | a5            | -0.056 | 0.005         | 0.009  | 0.000 |       |       |
|               |        | a5            | -0.029 | 0.032 | 0.056  | 0.000  |               |        | Gm15_31242502 | MPH    | C             | 0.081  | 0.972 | 1.000 | 0.935 |
|               |        | a6            | 0.242  | 0.027 | 0.003  | 0.057  |               |        |               |        | T             | -0.081 | 0.028 | 0.000 | 0.065 |
|               |        | a7            | -0.498 | 0.020 | 0.025  | 0.012  |               |        | Gm15_BLOCK383 | MPH    | G             | 0.232  | 0.982 | 0.994 | 0.967 |
|               |        | a8            | 0.396  | 0.018 | 0.031  | 0.000  |               |        |               |        | A             | -0.232 | 0.018 | 0.006 | 0.033 |
|               |        | a9            | -0.020 | 0.012 | 0.019  | 0.004  |               |        |               |        | a1            | 0.179  | 0.599 | 0.539 | 0.678 |
|               |        | a10           | -0.117 | 0.005 | 0.009  | 0.000  |               |        |               |        | a2            | 0.514  | 0.115 | 0.172 | 0.041 |
|               |        | a11           | -0.100 | 0.004 | 0.006  | 0.000  |               |        |               |        | a3            | -1.258 | 0.083 | 0.050 | 0.127 |
|               |        | a12           | -0.227 | 0.002 | 0.003  | 0.000  |               |        |               |        | a4            | -0.225 | 0.076 | 0.110 | 0.033 |
|               |        | Gm06_BLOCK522 | MPW    | a1    | -0.172 | 0.589  |               |        | 0.690         | 0.457  | Gm15_BLOCK409 | MPW    | a5    | 0.082 | 0.041 |
| a2            | -0.082 |               |        | 0.241 | 0.122  | 0.396  | a6            | 0.258  | 0.041         | 0.069  |               |        | 0.004 |       |       |
| a3            | -0.170 |               |        | 0.117 | 0.157  | 0.065  | a7            | -0.183 | 0.035         | 0.006  |               |        | 0.073 |       |       |
| a4            | -0.029 |               |        | 0.051 | 0.031  | 0.078  | a8            | 0.149  | 0.007         | 0.013  |               |        | 0.000 |       |       |
| a5            | 0.454  |               |        | 0.002 | 0.000  | 0.004  | a9            | 0.484  | 0.002         | 0.003  |               |        | 0.000 |       |       |
| Gm07_BLOCK25  | MPH    | a1            | 0.065  | 0.332 | 0.219  | 0.478  | Gm15_BLOCK409 | MPW    | a1            | 0.003  | 0.332         | 0.270  | 0.412 |       |       |
|               |        | a2            | -0.050 | 0.275 | 0.317  | 0.220  |               |        | a2            | 0.078  | 0.204         | 0.254  | 0.139 |       |       |
|               |        | a3            | -0.062 | 0.257 | 0.326  | 0.167  |               |        | a3            | -0.015 | 0.105         | 0.157  | 0.037 |       |       |
|               |        | a4            | 0.047  | 0.137 | 0.138  | 0.135  |               |        | a4            | 0.087  | 0.103         | 0.072  | 0.143 |       |       |
| Gm07_3177189  | MPW    | T             | -0.176 | 0.989 | 0.997  | 0.980  | Gm15_BLOCK409 | MPW    | a5            | 0.115  | 0.076         | 0.075  | 0.078 |       |       |
|               |        | C             | 0.176  | 0.011 | 0.003  | 0.020  |               |        | a6            | 0.080  | 0.064         | 0.110  | 0.004 |       |       |
| Gm07_BLOCK272 | MPH    | a1            | -0.139 | 0.977 | 0.966  | 0.992  | Gm15_BLOCK409 | MPW    | a7            | -0.070 | 0.044         | 0.047  | 0.041 |       |       |
|               |        | a2            | 0.139  | 0.023 | 0.034  | 0.008  |               |        | a8            | 0.079  | 0.034         | 0.000  | 0.078 |       |       |
| Gm07_BLOCK302 | MPW    | a1            | -0.021 | 0.601 | 0.583  | 0.624  | Gm15_BLOCK409 | MPW    | a9            | -0.019 | 0.020         | 0.000  | 0.045 |       |       |
|               |        | a2            | 0.158  | 0.390 | 0.417  | 0.355  |               |        | a10           | -0.051 | 0.016         | 0.013  | 0.020 |       |       |
|               |        | a3            | -0.121 | 0.007 | 0.000  | 0.016  |               |        | a11           | -0.333 | 0.002         | 0.003  | 0.000 |       |       |
|               |        | a4            | -0.016 | 0.002 | 0.000  | 0.004  |               |        | a12           | 0.045  | 0.002         | 0.000  | 0.004 |       |       |
| Gm07_BLOCK373 | MPW    | a1            | 0.036  | 0.447 | 0.404  | 0.502  | Gm16_2912151  | MPW    | C             | -0.045 | 0.954         | 0.981  | 0.918 |       |       |
|               |        | a2            | 0.008  | 0.294 | 0.373  | 0.192  |               |        | A             | 0.045  | 0.046         | 0.019  | 0.082 |       |       |
|               |        | a3            | -0.044 | 0.259 | 0.223  | 0.306  |               |        | Gm16_BLOCK67  | MPH    | a1            | 0.094  | 0.842 | 0.878 | 0.796 |
| Gm07_42499533 | MPH    | G             | -0.085 | 0.812 | 0.853  | 0.759  | a2            | -0.094 |               |        | 0.158         | 0.122  | 0.204 |       |       |
|               |        | A             | 0.085  | 0.188 | 0.147  | 0.241  | Gm16_7534785  | MPW    | C             | -0.074 | 0.954         | 0.978  | 0.922 |       |       |
| Gm08_BLOCK71  | MPW    | a1            | -0.007 | 0.931 | 0.878  | 1.000  |               |        | T             | 0.074  | 0.046         | 0.022  | 0.078 |       |       |
|               |        | a2            | -0.130 | 0.043 | 0.075  | 0.000  | Gm16_BLOCK395 | MPH    | a1            | 0.061  | 0.516         | 0.580  | 0.433 |       |       |
| a3            | -0.084 | 0.021         | 0.038  | 0.000 | a2     | -0.119 |               |        | 0.255         | 0.254  | 0.257         |        |       |       |       |
| a4            | 0.221  | 0.005         | 0.009  | 0.000 | a3     | 0.057  |               |        | 0.229         | 0.166  | 0.310         |        |       |       |       |
| Gm08_BLOCK106 | MPH    | a1            | -0.161 | 0.348 | 0.270  | 0.449  |               |        | Gm17_BLOCK344 | MPW    | a1            | 0.161  | 0.379 | 0.426 | 0.318 |
|               |        | a2            | 0.034  | 0.307 | 0.361  | 0.237  | a2            | 0.177  |               |        | 0.337         | 0.361  | 0.306 |       |       |
|               |        | a3            | -0.025 | 0.163 | 0.201  | 0.114  | a3            | 0.123  |               |        | 0.271         | 0.191  | 0.376 |       |       |
|               |        | a4            | 0.033  | 0.106 | 0.097  | 0.118  | a4            | 0.350  |               |        | 0.005         | 0.009  | 0.000 |       |       |
|               |        | a5            | -0.143 | 0.055 | 0.034  | 0.082  | a5            | -0.214 |               |        | 0.004         | 0.006  | 0.000 |       |       |
|               |        | a6            | 0.262  | 0.021 | 0.038  | 0.000  | a6            | -0.539 |               |        | 0.002         | 0.003  | 0.000 |       |       |
| Gm08_11056573 | MPW    | T             | 0.052  | 0.968 | 0.944  | 1.000  | a7            | -0.059 | 0.002         | 0.003  | 0.000         |        |       |       |       |

| SNPLDB        | Trait | Allele | Effect | CCSP  | LRS   | RCS   | SNPLDB        | Trait | Allele        | Effect | CCSP  | LRS    | RCS   |       |       |
|---------------|-------|--------|--------|-------|-------|-------|---------------|-------|---------------|--------|-------|--------|-------|-------|-------|
| Gm08_BLOCK165 | MPW   | A      | -0.052 | 0.032 | 0.056 | 0.000 | Gm18_BLOCK129 | MPH   | a1            | 0.002  | 0.727 | 0.790  | 0.645 |       |       |
|               |       | a1     | 0.044  | 0.587 | 0.502 | 0.698 |               |       | a2            | -0.075 | 0.230 | 0.163  | 0.318 |       |       |
|               |       | a2     | -0.044 | 0.413 | 0.498 | 0.302 |               |       | a3            | 0.073  | 0.043 | 0.047  | 0.037 |       |       |
| Gm08_BLOCK209 | MPW   | a1     | -0.076 | 0.906 | 0.959 | 0.837 | Gm18_BLOCK434 | MPH   | a1            | -0.237 | 0.938 | 0.909  | 0.976 |       |       |
|               |       | a2     | 0.076  | 0.094 | 0.041 | 0.163 |               |       | a2            | -0.095 | 0.053 | 0.085  | 0.012 |       |       |
| Gm08_BLOCK250 | MPH   | a1     | -0.243 | 0.908 | 0.862 | 0.967 | Gm18_BLOCK727 | MPH   | a3            | 0.332  | 0.009 | 0.006  | 0.012 |       |       |
|               |       | a2     | -0.343 | 0.090 | 0.135 | 0.033 |               |       | a1            | 0.001  | 0.569 | 0.589  | 0.543 |       |       |
|               |       | a3     | 0.586  | 0.002 | 0.003 | 0.000 |               |       | a2            | 0.119  | 0.418 | 0.389  | 0.457 |       |       |
| Gm08_28738663 | MPH   | G      | -0.097 | 0.878 | 0.934 | 0.804 | Gm18_BLOCK729 | MPH   | a3            | -0.121 | 0.012 | 0.022  | 0.000 |       |       |
|               |       | A      | 0.097  | 0.122 | 0.066 | 0.196 |               |       | a1            | 0.001  | 0.837 | 0.850  | 0.820 |       |       |
| Gm08_BLOCK466 | MPH   | a1     | 0.074  | 0.551 | 0.467 | 0.661 | Gm18_BLOCK736 | MPW   | a2            | 0.099  | 0.112 | 0.082  | 0.151 |       |       |
|               |       | a2     | 0.012  | 0.160 | 0.194 | 0.114 |               |       | a3            | -0.100 | 0.051 | 0.069  | 0.029 |       |       |
|               |       | a3     | -0.089 | 0.080 | 0.122 | 0.024 |               |       | a1            | 0.004  | 0.617 | 0.699  | 0.510 |       |       |
|               |       | a4     | -0.022 | 0.073 | 0.038 | 0.118 | Gm19_37391411 | MPH   | a2            | 0.066  | 0.332 | 0.238  | 0.453 |       |       |
|               |       | a5     | 0.078  | 0.050 | 0.078 | 0.012 |               |       | a3            | -0.070 | 0.051 | 0.063  | 0.037 |       |       |
|               |       | a6     | 0.157  | 0.037 | 0.050 | 0.020 |               |       | T             | 0.170  | 0.989 | 0.981  | 1.000 |       |       |
|               |       | a7     | 0.320  | 0.025 | 0.006 | 0.049 |               |       | C             | -0.170 | 0.011 | 0.019  | 0.000 |       |       |
|               |       | a8     | -0.362 | 0.012 | 0.022 | 0.000 |               |       | G             | 0.347  | 0.986 | 1.000  | 0.967 |       |       |
|               |       | a9     | -0.168 | 0.012 | 0.022 | 0.000 |               |       | A             | -0.347 | 0.014 | 0.000  | 0.033 |       |       |
| Gm09_2378279  | MPW   | G      | -0.038 | 0.598 | 0.655 | 0.522 | Gm19_42756453 | MPH   | T             | -0.189 | 0.986 | 0.997  | 0.971 |       |       |
|               |       | A      | 0.038  | 0.402 | 0.345 | 0.478 |               |       | G             | 0.189  | 0.014 | 0.003  | 0.029 |       |       |
| Gm09_4538598  | MPH   | T      | -0.045 | 0.504 | 0.448 | 0.576 | Gm19_BLOCK554 | MPW   | a1            | 0.044  | 0.438 | 0.357  | 0.543 |       |       |
|               |       | C      | 0.045  | 0.496 | 0.552 | 0.424 |               |       | a2            | -0.019 | 0.314 | 0.367  | 0.245 |       |       |
| Gm09_BLOCK115 | MPW   | a1     | -0.005 | 0.309 | 0.263 | 0.367 | Gm20_BLOCK210 | MPW   | a3            | 0.043  | 0.243 | 0.270  | 0.208 |       |       |
|               |       | a2     | 0.005  | 0.262 | 0.295 | 0.220 |               |       | a4            | 0.061  | 0.004 | 0.006  | 0.000 |       |       |
|               |       | a3     | 0.024  | 0.151 | 0.085 | 0.237 |               |       | a5            | -0.129 | 0.002 | 0.000  | 0.004 |       |       |
|               |       | a4     | -0.034 | 0.177 | 0.219 | 0.122 |               |       | a1            | -0.052 | 0.959 | 0.972  | 0.943 |       |       |
|               |       | a5     | -0.047 | 0.082 | 0.113 | 0.041 |               |       | a2            | 0.140  | 0.030 | 0.009  | 0.057 |       |       |
|               |       | a6     | -0.103 | 0.016 | 0.019 | 0.012 |               |       | a3            | 0.082  | 0.007 | 0.013  | 0.000 |       |       |
|               |       | a7     | 0.161  | 0.004 | 0.006 | 0.000 |               |       | a4            | -0.170 | 0.004 | 0.006  | 0.000 |       |       |
| Gm09_BLOCK142 | MPW   | a1     | -0.129 | 0.507 | 0.492 | 0.527 | Gm20_BLOCK388 | MPH   | a1            | -0.038 | 0.498 | 0.555  | 0.424 |       |       |
|               |       | a2     | -0.111 | 0.443 | 0.483 | 0.392 |               |       | a2            | -0.051 | 0.328 | 0.335  | 0.318 |       |       |
|               |       | a3     | -0.098 | 0.046 | 0.025 | 0.073 |               |       | a3            | 0.142  | 0.103 | 0.044  | 0.180 |       |       |
|               |       | a4     | 0.338  | 0.004 | 0.000 | 0.008 |               |       | a4            | -0.053 | 0.071 | 0.066  | 0.078 |       |       |
| Gm09_20590481 | MPH   | C      | 0.040  | 0.599 | 0.539 | 0.678 | Gm20_BLOCK429 | MPW   | a1            | 0.046  | 0.933 | 0.909  | 0.963 |       |       |
|               |       | T      | -0.040 | 0.401 | 0.461 | 0.322 |               |       | a2            | -0.046 | 0.067 | 0.091  | 0.037 |       |       |
| Gm09_37359880 | MPH   | C      | 0.150  | 0.970 | 0.991 | 0.943 | Gm20_39658098 | MPH   | G             | 0.164  | 0.973 | 1.000  | 0.939 |       |       |
|               |       | T      | -0.150 | 0.030 | 0.009 | 0.057 |               |       | A             | -0.164 | 0.027 | 0.000  | 0.061 |       |       |
| Gm10_BLOCK71  | MPW   | a1     | 0.015  | 0.539 | 0.520 | 0.563 | Gm20_41737971 | MPW   | G             | -0.034 | 0.934 | 0.893  | 0.988 |       |       |
|               |       | a2     | -0.049 | 0.293 | 0.357 | 0.208 |               |       | C             | 0.034  | 0.066 | 0.107  | 0.012 |       |       |
|               |       | a3     | 0.011  | 0.083 | 0.050 | 0.127 |               |       | Gm20_BLOCK531 | MPW    | a1    | 0.081  | 0.594 | 0.602 | 0.584 |
|               |       | a4     | 0.071  | 0.073 | 0.060 | 0.090 |               |       |               |        | a2    | -0.018 | 0.275 | 0.301 | 0.241 |
|               |       | a5     | -0.048 | 0.012 | 0.013 | 0.012 |               |       |               |        | a3    | 0.040  | 0.083 | 0.063 | 0.110 |
| Gm10_BLOCK96  | MPW   | a1     | 0.337  | 0.938 | 0.909 | 0.976 | Gm20_BLOCK531 | MPW   | a4            | -0.030 | 0.043 | 0.025  | 0.065 |       |       |
|               |       | a2     | 0.331  | 0.060 | 0.088 | 0.024 |               |       | a5            | -0.073 | 0.005 | 0.009  | 0.000 |       |       |
|               |       | a3     | -0.668 | 0.002 | 0.003 | 0.000 |               |       |               |        |       |        |       |       |       |

MPW and MPH represent the membership index values of relative plant weight and plant height, respectively. SNPLDB, SNP linkage disequilibrium block.

**Table S4.** The candidate genes of drought tolerance detected by qRT-PCR and their classifications.

| Gene                 | SNPLDB              | Trait   | N23644 (T) |      | N00710 (S) |       | Supper | Classification |   |   |   |   |   |    |    |    |   |   |   |   |
|----------------------|---------------------|---------|------------|------|------------|-------|--------|----------------|---|---|---|---|---|----|----|----|---|---|---|---|
|                      |                     |         | TL         | TR   | SL         | SR    |        | A              | S | T | D | P | M | TF | PK | UF | O |   |   |   |
| <i>Glyma05g16373</i> | Gm05_18374832       | MPWMPH  |            | 30.6 |            |       | √      |                | √ |   |   |   |   |    |    |    |   |   |   |   |
| <i>Glyma05g16380</i> |                     |         |            |      |            | 6.39  |        |                | √ | √ |   |   |   |    |    |    |   |   |   |   |
| <i>Glyma06g47300</i> | Gm06_BLOCK576 (RCS) | MPW MPH | 6.41       |      | 6.82       |       |        |                | √ | √ |   |   |   |    |    |    |   |   |   |   |
| <i>Glyma08g40360</i> | Gm08_BLOCK466 (LRS) | MPWMPH  |            |      |            | 5.3   |        |                | √ | √ |   |   |   |    |    |    |   |   |   |   |
| <i>Glyma08g40420</i> |                     |         |            | 5.24 | 9.71       |       |        |                | √ |   |   |   |   |    | √  |    |   |   |   |   |
| <i>Glyma20g30980</i> | Gm20_39658098 (RCS) | MPWMPH  |            |      | 0.16       |       |        |                | √ | √ | √ |   |   | √  |    |    |   |   |   |   |
| <i>Glyma20g31015</i> |                     |         |            |      | 6.45       |       |        |                |   | √ |   |   |   |    |    |    |   |   |   |   |
| <i>Glyma01g00321</i> | Gm01_149527         | MPW     |            |      | 7.31       |       |        |                | √ |   |   |   |   |    |    |    |   |   |   |   |
| <i>Glyma02g16170</i> | Gm02_14594196       | MPW     | 0.11       |      |            |       |        |                |   |   |   |   |   |    |    |    |   |   |   | √ |
| <i>Glyma02g16200</i> |                     |         |            | 15   | 15.03      |       |        |                | √ | √ | √ |   |   |    |    |    |   |   |   |   |
| <i>Glyma02g16220</i> |                     |         |            | 7.54 | 14.12      |       |        |                |   |   |   |   |   |    |    |    |   |   |   | √ |
| <i>Glyma02g45940</i> | Gm02_BLOCK579 (LRS) | MPW     |            | 8.03 |            |       |        |                |   |   |   |   |   |    |    |    |   |   |   | √ |
| <i>Glyma03g01224</i> | Gm03_993540         | MPW     |            | 13.8 | 64.45      |       |        |                | √ | √ |   | √ |   |    |    |    |   |   |   |   |
| <i>Glyma03g01262</i> |                     |         | 7.78       | 15.3 | 156.5      |       |        |                | √ | √ | √ | √ |   |    |    |    |   |   |   |   |
| <i>Glyma03g21690</i> | Gm03_BLOCK283 (LRS) | MPW     |            |      | 10.6       |       |        |                | √ | √ | √ | √ |   |    |    |    |   |   |   |   |
| <i>Glyma06g21080</i> |                     |         |            | 5.86 | 5.35       |       |        |                |   |   |   |   |   |    |    |    |   |   |   | √ |
| <i>Glyma06g21090</i> |                     |         |            |      | 13.93      |       |        |                |   |   |   |   |   |    | √  |    |   |   |   |   |
| <i>Glyma06g42121</i> | Gm06_BLOCK522 (RCS) | MPW     |            | 9.61 | 20.46      |       |        |                |   |   |   |   |   |    | √  |    |   |   |   |   |
| <i>Glyma09g03350</i> | Gm09_2378279        | MPW     |            |      | 33.47      |       |        |                |   |   |   |   |   |    | √  | √  |   |   |   |   |
| <i>Glyma10g06780</i> | Gm10_BLOCK71        | MPW     |            | 5.1  |            |       |        |                |   |   |   |   |   |    |    |    |   |   |   | √ |
| <i>Glyma10g06810</i> |                     |         | 10.3       |      |            |       |        |                | √ | √ | √ |   |   |    |    |    |   |   |   |   |
| <i>Glyma10g11700</i> | Gm10_BLOCK159 (LRS) | MPW     | 21.1       |      |            |       |        |                |   |   |   |   |   |    |    |    |   |   |   | √ |
| <i>Glyma10g11706</i> |                     |         |            |      | 5.35       | 10.41 |        |                |   |   |   |   |   |    | √  |    |   |   |   |   |
| <i>Glyma10g11720</i> |                     |         |            |      | 9.58       | 28.64 |        |                |   |   |   |   |   |    | √  |    |   |   |   |   |
| <i>Glyma10g11775</i> |                     |         |            |      | 0.11       |       |        |                | √ | √ |   |   |   |    |    |    |   |   |   | √ |
| <i>Glyma10g17230</i> | Gm10_BLOCK229 (LRS) | MPW     |            | 5.94 | 9.65       | 69.55 |        |                |   |   |   |   |   |    | √  |    |   |   |   |   |
| <i>Glyma13g25290</i> | Gm13_BLOCK338       | MPW     |            | 0.02 |            |       |        |                |   |   |   |   |   |    |    |    |   |   |   | √ |
| <i>Glyma13g25350</i> |                     |         | 5.55       | 0.04 |            |       |        |                | √ | √ |   |   |   |    |    |    |   |   |   |   |
| <i>Glyma13g25380</i> |                     |         |            | 0.2  | 8.12       |       |        |                |   |   |   |   |   |    |    |    |   |   |   | √ |
| <i>Glyma13g25390</i> |                     |         |            | 0.14 |            |       |        |                |   |   |   |   |   |    | √  | √  |   |   |   |   |
| <i>Glyma13g25420</i> |                     |         |            | 10.1 |            |       |        |                | √ | √ |   |   |   |    |    |    |   |   |   |   |
| <i>Glyma13g40100</i> | Gm13_BLOCK486 (LRS) | MPW     | 6.08       |      |            |       |        |                | √ | √ | √ |   |   |    |    |    |   |   |   |   |
| <i>Glyma13g40170</i> |                     |         |            |      | 6.41       | 31.78 |        |                |   |   |   |   |   |    | √  |    |   |   |   |   |
| <i>Glyma13g40220</i> |                     |         |            | 22.1 |            |       |        |                |   |   |   |   |   |    |    |    |   |   |   | √ |
| <i>Glyma13g40240</i> |                     |         |            | 11.2 | 7.73       |       |        |                | √ | √ | √ | √ | √ | √  | √  | √  | √ | √ | √ |   |
| <i>Glyma13g40251</i> |                     |         | 5.31       | 10.7 | 10.93      |       |        |                |   |   |   |   |   |    | √  |    |   |   |   | √ |
| <i>Glyma13g40260</i> |                     |         |            | 26.6 |            |       |        |                | √ |   |   |   |   |    | √  |    |   |   |   |   |
| <i>Glyma01g04151</i> | Gm01_3646943        | MPW     |            | 6.94 | 8.4        |       |        |                |   |   |   |   |   |    | √  |    |   |   |   |   |
| <i>Glyma01g04160</i> |                     |         |            |      | 32         |       |        |                |   |   |   |   |   |    | √  |    |   |   |   |   |
| <i>Glyma01g04200</i> |                     |         |            | 9.35 | 29.86      |       |        |                | √ | √ |   |   |   |    |    |    |   |   |   |   |
| <i>Glyma02g08115</i> | Gm02_BLOCK81        | MPW     | 14.5       |      | 66.3       |       |        |                | √ | √ | √ | √ |   |    |    |    |   |   |   |   |
| <i>Glyma02g08130</i> |                     |         |            | 25   | 8.69       | 33.36 |        |                | √ |   |   |   |   |    | √  |    |   |   |   |   |
| <i>Glyma02g08145</i> |                     |         |            | 6    | 17.03      |       |        |                | √ |   |   |   |   |    |    |    |   |   |   | √ |
| <i>Glyma02g08160</i> |                     |         |            | 8.54 |            |       |        |                |   |   |   |   |   |    | √  |    |   |   |   |   |
| <i>Glyma02g08201</i> |                     |         |            | 5.12 | 7.26       |       |        |                |   |   |   |   |   |    |    |    |   |   |   | √ |
| <i>Glyma02g08210</i> |                     |         |            | 5.92 | 8.63       |       |        |                | √ | √ | √ | √ |   |    |    |    |   |   |   |   |
| <i>Glyma02g08231</i> |                     |         |            | 8.49 | 71.01      |       |        |                | √ |   |   |   |   |    | √  |    |   |   |   |   |
| <i>Glyma02g08241</i> |                     |         |            | 13   | 11.96      |       |        |                | √ | √ | √ | √ |   |    |    |    |   |   |   | √ |
| <i>Glyma02g08250</i> |                     |         |            |      | 39.95      |       |        |                |   |   |   |   |   |    | √  |    |   |   |   |   |
| <i>Glyma03g00590</i> | Gm03_326463         | MPW     |            | 6.66 |            |       |        |                |   |   |   |   |   |    | √  | √  |   |   |   | √ |
| <i>Glyma03g00980</i> | Gm03_BLOCK11        | MPW     |            | 8.66 | 9.06       | 7.46  |        |                |   |   |   |   |   |    | √  |    |   |   |   | √ |
| <i>Glyma05g17470</i> | Gm05_20554448       | MPW     |            |      | 8.85       | 90.2  |        |                | √ |   |   |   |   |    | √  |    |   |   |   |   |

| Gene                 | SNPLDB                     | Trait | N23644 (T) |      | N00710 (S) |       | Supper | Classification |   |   |   |   |   |   |   |   |   |   |   |   |
|----------------------|----------------------------|-------|------------|------|------------|-------|--------|----------------|---|---|---|---|---|---|---|---|---|---|---|---|
|                      |                            |       | TL         | TR   | SL         | SR    |        | A              | S | T | D | P | M | T | F | P | K | U | F | O |
| <i>Glyma06g24540</i> | Gm06_BLOCK264              | MPW   |            |      |            | 10.16 |        | √              |   |   |   |   |   |   |   |   |   |   |   |   |
| <i>Glyma06g35630</i> | Gm06_BLOCK401              | MPW   |            | 5.8  |            | 54    |        |                |   |   |   |   |   |   |   |   |   |   |   | √ |
| <i>Glyma07g21050</i> | Gm07_BLOCK229 (LRS)        | MPW   |            |      |            | 29.96 |        |                |   |   |   |   |   |   |   |   |   |   |   | √ |
| <i>Glyma07g31880</i> | Gm07_BLOCK373              | MPW   |            | 8.85 | 7.24       | 20.04 |        |                |   |   | √ |   |   | √ |   |   |   |   |   |   |
| <i>Glyma08g06870</i> | Gm08_BLOCK49 (LRS)         | MPW   |            |      |            | 5.19  |        |                |   |   | √ |   |   |   |   |   |   |   |   |   |
| <i>Glyma08g10070</i> | Gm08_BLOCK71 (LRS)         | MPW   |            |      | 6.04       |       |        |                |   |   |   |   |   |   |   |   |   |   |   | √ |
| <i>Glyma08g10080</i> |                            |       |            |      |            | 48    |        |                |   |   |   |   |   |   |   |   |   |   |   | √ |
| <i>Glyma08g15250</i> | Gm08_11056573 (LRS)        | MPW   |            |      |            | 17.09 |        |                |   |   | √ |   |   |   |   |   |   |   |   |   |
| <i>Glyma08g45250</i> | Gm08_BLOCK527 (LRS)        | MPW   |            | 5.08 |            | 9.09  |        |                |   |   |   |   |   |   |   |   |   |   |   | √ |
| <i>Glyma09g09120</i> | Gm09_BLOCK115 (LRS)        | MPW   |            | 5.06 |            | 9.99  |        |                |   |   |   |   |   |   |   |   |   |   |   | √ |
| <i>Glyma09g09140</i> |                            |       |            |      |            | 10.13 |        |                |   |   |   |   |   |   |   |   |   |   |   | √ |
| <i>Glyma09g09190</i> |                            |       |            |      |            | 8.46  |        |                |   |   |   |   |   |   |   |   |   |   |   | √ |
| <i>Glyma09g11360</i> | Gm09_BLOCK142 (RCS)        | MPW   | 5.3        | 7.01 |            | 5.66  |        |                |   |   | √ |   |   |   |   |   |   |   |   |   |
| <i>Glyma09g28380</i> | Gm09_35353845              | MPW   | 0.18       |      |            |       |        |                |   |   | √ | √ |   |   |   |   |   |   |   |   |
| <i>Glyma09g29760</i> | Gm09_36608762              | MPW   |            |      | 13.5       | 18.77 |        |                |   |   |   | √ |   |   | √ |   |   |   |   |   |
| <i>Glyma10g08210</i> | Gm10_BLOCK96 (LRS)         | MPW   |            |      |            | 18    |        |                |   |   | √ |   |   |   |   |   |   |   |   |   |
| <i>Glyma10g29340</i> | Gm10_38212261              | MPW   |            |      | 7.01       |       |        |                |   |   | √ | √ |   |   |   |   |   |   |   |   |
| <i>Glyma11g24236</i> | Gm11_BLOCK241              | MPW   | 0.13       |      |            |       |        |                |   |   |   |   |   |   |   |   |   |   |   | √ |
| <i>Glyma11g27270</i> | Gm11_26892595              | MPW   |            |      |            | 16.45 |        |                |   |   |   |   |   |   |   |   |   |   |   | √ |
| <i>Glyma12g10550</i> | Gm12_8508827               | MPW   |            |      | 7.67       | 25.11 |        |                |   |   | √ | √ | √ | √ |   |   |   |   |   |   |
| <i>Glyma12g20460</i> | Gm12_BLOCK254 (LRS)        | MPW   |            |      |            | 5.28  |        |                |   |   |   |   | √ |   |   |   |   |   |   | √ |
| <i>Glyma12g30780</i> | Gm12_BLOCK402              | MPW   |            |      |            | 7.84  |        |                |   |   | √ | √ | √ | √ | √ |   |   |   |   |   |
| <i>Glyma12g32950</i> | Gm12_BLOCK429              | MPW   |            |      | 7.57       | 50.91 |        |                |   |   |   |   |   |   |   |   |   |   |   | √ |
| <i>Glyma13g02310</i> | Gm13_2179313               | MPW   |            |      |            | 8.88  |        |                |   |   | √ |   |   |   |   |   |   |   | √ |   |
| <i>Glyma14g32430</i> | Gm14_39515432              | MPW   | 22.3       |      | 96         |       |        |                |   |   | √ |   |   |   | √ |   |   |   |   |   |
| <i>Glyma15g13420</i> |                            |       |            | 36.9 |            | 42.67 |        |                |   |   | √ |   |   |   |   |   |   |   |   | √ |
| <i>Glyma15g13430</i> |                            |       |            | 23.7 |            | 5.74  |        |                |   |   | √ | √ |   |   |   |   |   |   |   |   |
| <i>Glyma15g13440</i> |                            |       |            | 8.72 |            | 6.36  |        |                |   |   |   |   |   |   |   |   |   |   |   | √ |
| <i>Glyma15g13450</i> |                            |       |            | 10.5 |            |       |        |                |   |   |   |   |   |   |   |   |   |   |   | √ |
| <i>Glyma16g03450</i> | Gm16_2912151               | MPW   |            | 11.4 |            | 5.31  |        |                |   |   |   |   |   |   |   |   |   |   |   | √ |
| <i>Glyma16g08270</i> | Gm16_7534785               | MPW   |            |      |            | 19.56 |        |                |   |   |   |   |   |   | √ |   |   |   |   |   |
| <i>Glyma16g27350</i> | Gm16_BLOCK365              | MPW   |            |      |            | 11.47 |        |                |   |   |   |   |   | √ |   |   |   |   |   |   |
| <i>Glyma17g29840</i> | Gm17_BLOCK344 (LRS)        | MPW   |            |      |            | 5.43  |        |                |   |   |   |   |   |   | √ |   |   |   |   |   |
| <i>Glyma17g29850</i> |                            |       | 5.46       | 10.3 |            |       |        |                |   |   |   |   |   | √ |   |   |   |   |   |   |
| <i>Glyma19g38890</i> | Gm19_BLOCK554 (RCS LRS)    | MPW   |            | 11.2 | 10.1       | 10.06 |        |                |   |   |   |   |   |   |   | √ |   |   | √ |   |
| <i>Glyma20g05491</i> | Gm20_6329124               | MPW   | 5.58       | 11   |            | 36.25 |        |                |   |   |   |   |   |   |   |   |   |   |   | √ |
| <i>Glyma20g36520</i> | Gm20_BLOCK531 (LRS)        | MPW   |            | 5.24 |            |       |        |                |   |   |   |   |   |   |   |   |   |   |   | √ |
| <i>Glyma20g36540</i> |                            |       |            | 8.51 |            |       |        |                |   |   |   |   |   |   | √ |   |   |   |   |   |
| <i>Glyma20g36550</i> |                            |       |            |      |            | 5.35  |        |                |   |   |   |   |   |   | √ |   |   |   |   |   |
| <i>Glyma20g36580</i> |                            |       |            | 10.8 |            | 36.25 |        |                |   |   |   |   |   |   |   |   |   |   |   | √ |
| <i>Glyma02g26160</i> | <b>Gm02_BLOCK299 (LRS)</b> | MPH   | 9.35       |      | 22.9       | 81.01 |        |                |   |   | √ | √ | √ | √ |   |   |   |   |   |   |
| <i>Glyma06g19220</i> | <b>Gm06_BLOCK172</b>       | MPH   |            | 15.6 |            | 98.02 |        |                |   |   | √ |   |   |   |   |   |   |   |   | √ |
| <i>Glyma06g21540</i> | <b>Gm06_BLOCK208 (LRS)</b> | MPH   |            | 6.68 |            | 19.49 |        |                |   |   |   |   |   |   |   |   |   |   |   | √ |
| <i>Glyma06g21560</i> |                            |       |            |      |            | 10.74 |        |                |   |   |   | √ | √ | √ | √ |   |   |   |   |   |
| <i>Glyma06g21570</i> |                            |       |            |      |            | 83.58 |        |                |   |   | √ |   |   |   |   |   |   |   |   |   |
| <i>Glyma06g21584</i> |                            |       |            | 10.5 |            | 133.9 |        |                |   |   | √ | √ | √ | √ |   |   |   |   |   |   |
| <i>Glyma06g21596</i> |                            |       |            |      |            | 57.88 |        |                |   |   |   | √ | √ |   |   |   |   |   |   |   |
| <i>Glyma06g21608</i> |                            |       |            |      |            | 35.38 |        |                |   |   |   | √ |   |   |   |   |   |   |   |   |
| <i>Glyma06g21620</i> |                            |       |            |      |            | 10.16 |        |                |   |   |   | √ |   |   |   |   |   |   |   |   |
| <i>Glyma06g21651</i> |                            |       |            | 5.86 |            |       |        |                |   |   |   |   |   |   |   |   |   |   |   | √ |
| <i>Glyma06g21665</i> |                            |       |            |      | 5.31       | 42.08 |        |                |   |   |   | √ | √ | √ |   |   |   |   |   |   |
| <i>Glyma06g21681</i> |                            |       |            |      |            | 5.41  |        |                |   |   |   |   |   |   | √ |   |   |   |   |   |
| <i>Glyma06g21695</i> |                            |       |            |      |            | 16.17 |        |                |   |   |   | √ |   |   |   |   |   |   |   |   |
| <i>Glyma06g21710</i> |                            |       |            |      |            | 12.25 |        |                |   |   |   | √ |   |   |   |   |   |   |   |   |



| Gene                 | SNPLDB              | Trait | N23644 (T) |      | N00710 (S) |       | Supper | Classification |   |   |   |    |    |    |    |   |
|----------------------|---------------------|-------|------------|------|------------|-------|--------|----------------|---|---|---|----|----|----|----|---|
|                      |                     |       | TL         | TR   | SL         | SR    |        | A              | S | T | D | PM | TF | PK | UF | O |
| <i>Glyma06g40170</i> | Gm06_BLOCK491 (LRS) | MPH   |            | 6.87 |            | 127.6 | √      |                | √ |   | √ |    |    |    |    |   |
| <i>Glyma06g40240</i> |                     |       | 5.05       |      |            | 48.84 |        |                | √ |   | √ |    |    |    |    |   |
| <i>Glyma06g40270</i> |                     |       |            |      |            | 6.45  |        | √              | √ |   | √ |    |    |    |    |   |
| <i>Glyma06g40291</i> |                     |       | 5.92       | 8.17 |            | 24.59 |        |                |   |   |   |    |    |    |    | √ |
| <i>Glyma06g40311</i> |                     |       | 5.92       | 8.4  |            | 58.08 |        |                |   | √ |   |    |    |    | √  |   |
| <i>Glyma06g40330</i> |                     |       |            |      |            | 11.63 |        | √              | √ |   |   |    |    |    |    |   |
| <i>Glyma07g03770</i> | Gm07_BLOCK25        | MPH   |            |      |            | 7.41  |        |                |   |   |   |    |    |    |    | √ |
| <i>Glyma07g03780</i> |                     |       | 9.99       | 8.69 | 32         |       |        | √              | √ | √ |   |    |    |    |    |   |
| <i>Glyma07g03790</i> |                     |       | 13.6       | 9.51 | 47.5       |       |        |                |   |   |   |    |    |    |    | √ |
| <i>Glyma07g03800</i> |                     |       |            |      |            | 12.73 |        |                |   |   |   |    |    |    |    | √ |
| <i>Glyma08g14190</i> | Gm08_BLOCK106 (LRS) | MPH   |            |      |            | 6.73  |        |                |   |   |   |    |    |    |    | √ |
| <i>Glyma08g14200</i> |                     |       |            |      |            | 7.41  |        |                |   |   |   |    |    |    |    | √ |
| <i>Glyma08g14210</i> |                     |       |            |      |            | 0.06  |        | √              | √ |   | √ |    |    |    | √  |   |
| <i>Glyma13g10680</i> | Gm13_BLOCK177 (LRS) | MPH   |            |      |            | 28.05 |        | √              | √ |   |   |    |    |    |    |   |
| <i>Glyma13g10690</i> |                     |       |            |      |            | 61.82 |        |                |   |   |   |    |    |    | √  |   |
| <i>Glyma13g10720</i> |                     |       |            |      |            | 13.83 |        |                |   | √ |   |    |    |    |    |   |
| <i>Glyma13g10750</i> |                     |       |            |      |            | 6.23  |        |                |   | √ |   |    |    |    |    |   |
| <i>Glyma14g26830</i> | Gm14_BLOCK408 (LRS) | MPH   | 22.3       |      | 96         |       |        | √              |   |   |   |    |    |    |    | √ |
| <i>Glyma14g26960</i> |                     |       |            |      | 5.46       | 132.5 |        | √              |   |   |   |    |    |    |    | √ |
| <i>Glyma14g27015</i> |                     |       |            |      | 5.17       | 76.11 |        |                |   |   |   |    |    |    |    | √ |
| <i>Glyma15g30265</i> | Gm15_BLOCK383 (LRS) | MPH   |            |      |            | 8.63  |        |                |   |   | √ |    |    |    |    |   |
| <i>Glyma16g32170</i> | Gm16_BLOCK395       | MPH   | 0.2        |      |            |       |        |                |   |   | √ |    |    |    |    |   |
| <i>Glyma16g32180</i> |                     |       | 0.11       |      |            |       |        |                |   |   | √ |    |    |    |    |   |
| <i>Glyma01g34780</i> | Gm01_BLOCK493 (RCS) | MPH   | 0.13       |      |            |       |        |                |   | √ | √ | √  |    |    | √  |   |
| <i>Glyma01g34800</i> |                     |       |            | 18.1 |            |       |        |                |   | √ | √ |    |    |    |    |   |
| <i>Glyma01g34830</i> |                     |       |            | 5.33 |            |       |        |                |   |   | √ | √  | √  |    |    |   |
| <i>Glyma01g39120</i> | Gm01_BLOCK546       | MPH   |            |      |            | 30.7  |        |                |   |   |   |    |    |    |    | √ |
| <i>Glyma01g39140</i> |                     |       |            |      |            | 18.64 |        |                |   |   |   |    |    |    |    | √ |
| <i>Glyma02g00371</i> | Gm02_161337         | MPH   |            | 7.97 |            |       |        |                |   |   |   |    |    |    |    | √ |
| <i>Glyma02g46800</i> | Gm02_50652770       | MPH   |            |      |            | 5.43  |        |                |   |   | √ |    |    |    |    |   |
| <i>Glyma04g33410</i> | Gm04_BLOCK490 (RCS) | MPH   |            |      |            | 5.43  |        |                |   |   | √ |    | √  |    |    |   |
| <i>Glyma04g33540</i> |                     |       |            |      |            | 81.57 |        | √              |   |   |   |    |    |    |    | √ |
| <i>Glyma04g41740</i> | Gm04_47582011       | MPH   |            |      | 12.5       |       |        |                |   |   | √ | √  |    | √  |    |   |
| <i>Glyma06g33850</i> | Gm06_34868214       | MPH   |            | 7.89 |            | 6.7   |        |                |   | √ | √ |    |    |    |    |   |
| <i>Glyma07g16651</i> | Gm07_16348924       | MPH   |            | 12.1 | 17.5       | 89.57 |        | √              |   |   |   |    |    |    |    | √ |
| <i>Glyma07g16660</i> |                     |       |            | 6.23 |            |       |        |                |   |   |   |    |    |    |    | √ |
| <i>Glyma07g16690</i> |                     |       |            |      |            | 45.1  |        |                |   |   | √ |    |    |    |    |   |
| <i>Glyma07g18280</i> | Gm07_BLOCK194       | MPH   | 16.6       |      | 75.6       | 211.6 |        | √              | √ | √ |   |    |    |    |    |   |
| <i>Glyma07g28770</i> | Gm07_32919498       | MPH   |            | 6.06 | 14.9       | 75.32 |        |                |   |   |   |    |    |    |    | √ |
| <i>Glyma07g37440</i> | Gm07_42499533       | MPH   |            | 7.16 |            | 12.77 |        |                |   |   |   |    |    |    |    | √ |
| <i>Glyma09g05781</i> | Gm09_4538598        | MPH   |            | 9.45 | 20.3       | 5.94  |        |                |   |   |   |    |    | √  |    |   |
| <i>Glyma09g05800</i> |                     |       |            | 5.35 | 11.6       | 10.2  |        |                |   |   |   |    |    |    |    | √ |
| <i>Glyma09g16901</i> | Gm09_20590481       | MPH   |            | 11.8 | 7.81       | 24.93 |        |                |   |   | √ |    |    |    |    |   |
| <i>Glyma09g35990</i> | Gm09_41866356       | MPH   |            |      |            | 0.15  |        |                |   |   |   |    |    |    |    | √ |
| <i>Glyma11g16653</i> | Gm11_BLOCK135 (LRS) | MPH   |            |      |            | 12.82 |        |                |   |   |   |    |    |    |    | √ |
| <i>Glyma11g16700</i> |                     |       |            |      | 21.6       |       |        |                |   |   |   |    |    |    |    | √ |
| <i>Glyma11g16750</i> |                     |       | 32.8       |      |            | 8     |        | √              | √ | √ |   |    |    |    |    |   |
| <i>Glyma11g27920</i> | Gm11_27967762       | MPH   |            |      |            | 23    |        |                |   |   |   |    |    |    |    | √ |
| <i>Glyma11g29770</i> | Gm11_BLOCK344       | MPH   |            | 14.7 |            |       |        |                |   |   |   |    |    |    |    | √ |
| <i>Glyma11g29800</i> |                     |       |            |      |            | 9.78  |        |                |   | √ | √ | √  |    |    |    |   |
| <i>Glyma11g29810</i> |                     |       |            | 16.3 |            | 56.1  |        |                |   |   |   |    |    |    |    | √ |
| <i>Glyma12g29190</i> | Gm12_32591630       | MPH   |            |      |            | 45.25 |        | √              | √ |   |   |    |    |    |    |   |
| <i>Glyma13g19830</i> | Gm13_23309035       | MPH   |            | 7.57 |            | 6.36  |        |                |   |   |   |    |    |    |    | √ |
| <i>Glyma13g25200</i> | Gm13_28457573       | MPH   |            | 15.7 | 13.3       |       |        |                |   |   |   |    |    |    |    | √ |

| Gene                 | SNPLDB              | Trait | N23644 (T) |      | N00710 (S) |       | Supper | Classification |   |   |   |    |    |    |    |   |  |   |
|----------------------|---------------------|-------|------------|------|------------|-------|--------|----------------|---|---|---|----|----|----|----|---|--|---|
|                      |                     |       | TL         | TR   | SL         | SR    |        | A              | S | T | D | PM | TF | PK | UF | O |  |   |
| <i>Glyma13g25240</i> |                     |       |            | 20.8 | 33.2       |       |        | √              | √ |   |   |    |    |    |    |   |  |   |
| <i>Glyma13g30090</i> | Gm13_BLOCK396       | MPH   |            | 9    | 31.5       | 18.64 |        | √              | √ | √ | √ |    |    |    |    |   |  | √ |
| <i>Glyma13g30100</i> |                     |       |            |      |            | 18    |        |                |   |   | √ |    |    |    |    |   |  | √ |
| <i>Glyma13g30110</i> |                     |       |            | 10.3 | 22.9       |       |        | √              |   |   | √ |    |    |    |    |   |  | √ |
| <i>Glyma14g21901</i> | Gm14_25589678       | MPH   |            |      |            | 6.92  |        | √              | √ | √ |   |    |    |    |    |   |  | √ |
| <i>Glyma16g06770</i> | Gm16_BLOCK67        | MPH   |            | 108  |            |       |        | √              |   |   |   |    |    |    |    |   |  | √ |
| <i>Glyma18g10830</i> | Gm18_BLOCK129       | MPH   |            |      |            | 34.7  |        |                |   |   |   |    |    |    |    |   |  | √ |
| <i>Glyma18g10850</i> |                     |       |            |      |            | 0.09  |        |                |   |   |   |    |    |    |    |   |  | √ |
| <i>Glyma18g33230</i> | Gm18_BLOCK434       | MPH   |            |      |            | 7.41  |        |                |   |   |   |    |    |    |    |   |  | √ |
| <i>Glyma18g52360</i> | Gm18_BLOCK727 (LRS) | MPH   |            | 12.3 | 11.4       |       |        |                |   |   | √ |    |    |    |    |   |  |   |
| <i>Glyma18g52430</i> | Gm18_BLOCK729       | MPH   |            |      |            | 0.16  |        |                |   |   |   |    |    |    |    |   |  | √ |
| <i>Glyma18g52470</i> |                     |       |            |      |            | 32.6  |        | √              |   |   |   |    |    |    |    |   |  | √ |
| <i>Glyma19g33820</i> | Gm19_41440516       | MPH   |            | 5.88 |            | 7.57  |        |                |   |   |   |    |    |    |    |   |  | √ |
| <i>Glyma19g34540</i> | Gm19_42142070 (RCS) | MPH   |            | 0.15 | 6.52       |       |        |                |   |   |   |    |    |    |    |   |  | √ |
| <i>Glyma19g35236</i> | Gm19_42756453       | MPH   |            |      | 11         | 5.62  |        | √              | √ | √ |   |    |    |    |    |   |  |   |
| <i>Glyma19g35251</i> |                     |       |            |      | 24.9       | 18    |        | √              | √ | √ |   |    |    |    |    |   |  |   |
| <i>Glyma19g35261</i> |                     |       |            | 18.2 |            |       |        | √              | √ | √ |   |    |    |    |    |   |  |   |

Two accessions, drought tolerant N23644 (T) and drought sensitive N00710 (S), with MPWs of 0.750 and 0.098, respectively, were used for differential expression analysis using qRT-PCR. Here listed are two relative values (treated vs respective control) of leaf (L) and root (R) for the 177 genes displaying a significantly differential expression in response to 1.0 h-10% PEG in at least one pair of comparison. The candidate genes and corresponding QTL in boldface represents the gene is located in a large-contribution major QTL. In the columns of SNPLDB, the "LRS" in the parentheses represent the locus carrying allele(s) specific to the landrace subpopulation; the "RCS" in the parentheses represent the locus carrying allele(s) specific to the released cultivar subpopulation. In the Trait column, MPH and MPH represent the membership index values of relative plant weight and plant height, respectively. Supper: the supper candidate genes with the relative expression value more than 1.5 times the inter-quartile range based on boxplot are marked with "√". In Classification column, A, S, T, D, PM, TF, PK, UF and O, represent the nine biological categories of candidate genes, i.e. ABA responders, stress responders, transports, development factors, protein metabolism, transcription factors, protein kinases, unknown function and others, respectively.

**Table S5.** The candidate gene-allele system of DT in soybean.

| Gene                 | Trait | P     | Allele | Effect | Gene                 | Trait | P     | Allele  | Effect |
|----------------------|-------|-------|--------|--------|----------------------|-------|-------|---------|--------|
| <i>Glyma01g00321</i> | MPW   | 0.278 | G      | 0.418  | <i>Glyma04g33410</i> | MPH   | 0.574 | A       | 0.123  |
|                      |       |       | A      | 0.509  |                      |       |       | G       | 0.081  |
| <i>Glyma01g04160</i> | MPW   | 0.344 | A      | 0.437  | <i>Glyma04g41740</i> | MPH   | 0.559 | C       | 0.122  |
|                      |       |       | G      | 0.414  |                      |       |       | T       | 0.056  |
| <i>Glyma02g08115</i> | MPW   | 0.043 | AC     | 0.440  | <i>Glyma06g33850</i> | MPH   | 0.400 | G       | 0.123  |
|                      |       |       | GT     | 0.398  |                      |       |       | A       | 0.041  |
| <i>Glyma02g16220</i> | MPW   | 0.611 | A      | 0.292  | <i>Glyma06g40240</i> | MPH   | 0.015 | TTT     | 0.158  |
|                      |       |       | T      | 0.420  |                      |       |       | TTC     | 0.071  |
| <i>Glyma03g00590</i> | MPW   | 0.349 | CC     | 0.431  | <i>Glyma06g40330</i> | MPH   | 0.253 | TAT     | 0.113  |
|                      |       |       | AC     | 0.399  |                      |       |       | ATT     | -0.046 |
|                      |       |       | CA     | 0.399  |                      |       |       | T       | 0.136  |
|                      |       |       | T      | 0.429  |                      |       |       | C       | 0.094  |
| <i>Glyma03g01262</i> | MPW   | 0.043 | C      | 0.373  | <i>Glyma07g03770</i> | MPH   | 0.016 | TA      | 0.085  |
|                      |       |       | A      | 0.419  |                      |       |       | GG      | 0.171  |
| <i>Glyma05g16380</i> | MPW   | 0.555 | C      | 0.567  | <i>Glyma07g03780</i> | MPH   | 0.983 | A       | 0.121  |
|                      |       |       | MPH    | 0.963  |                      |       |       | T       | 0.120  |
|                      | MPW   | 0.555 | C      | 0.101  | <i>Glyma07g16651</i> | MPH   | 0.962 | T       | 0.121  |
|                      |       |       | T      | 0.567  |                      |       |       | C       | 0.114  |
| <i>Glyma06g24540</i> | MPW   | 0.707 | C      | 0.419  | <i>Glyma07g37440</i> | MPH   | 0.002 | T       | 0.099  |
|                      |       |       | T      | 0.474  |                      |       |       | G       | 0.259  |
| <i>Glyma06g35630</i> | MPW   | 0.826 | TG     | 0.419  | <i>Glyma08g14200</i> | MPH   | 0.009 | A       | 0.154  |
|                      |       |       | CG     | 0.426  |                      |       |       | G       | 0.057  |
|                      |       |       | CA     | 0.393  |                      |       |       | CG      | 0.135  |
|                      |       |       | A      | 0.412  |                      |       |       | TG      | 0.103  |
| <i>Glyma06g47300</i> | MPW   | 0.587 | T      | 0.424  | <i>Glyma09g35990</i> | MPH   | 0.454 | CT      | 0.000  |
|                      |       |       | MPH    | 0.702  |                      |       |       | G       | 0.097  |
| <i>Glyma08g15250</i> | MPW   | 0.056 | A      | 0.112  | <i>Glyma11g16653</i> | MPH   | 0.138 | C       | 0.150  |
|                      |       |       | T      | 0.126  |                      |       |       | A       | 0.055  |
|                      |       |       | TC     | 0.406  |                      |       |       | G       | 0.130  |
|                      |       |       | TG     | 0.437  |                      |       |       | C       | 0.123  |
| <i>Glyma09g09140</i> | MPW   | 0.867 | AG     | 0.535  | <i>Glyma13g10680</i> | MPH   | 0.159 | G       | 0.115  |
|                      |       |       | A      | 0.419  |                      |       |       | ACACCC  | 0.122  |
|                      |       |       | G      | 0.425  |                      |       |       | ACACCT  | 0.145  |
|                      |       |       | A      | 0.353  |                      |       |       | ATACCT  | 0.051  |
| <i>Glyma10g29340</i> | MPW   | 0.009 | G      | 0.431  | <i>Glyma13g10720</i> | MPH   | 0.825 | GCGTCT  | 0.198  |
|                      |       |       | C      | 0.415  |                      |       |       | GCGTTC  | -0.013 |
| <i>Glyma12g30780</i> | MPW   | 0.233 | T      | 0.454  | <i>Glyma13g10750</i> | MPH   | 0.306 | CATTCGC | 0.111  |
|                      |       |       | CGC    | 0.383  |                      |       |       | CATTTAT | 0.116  |
| <i>Glyma12g32950</i> | MPW   | 0.000 | GGC    | 0.463  | <i>Glyma13g25200</i> | MPH   | 0.177 | AATTTAT | 0.114  |
|                      |       |       | CCT    | 0.476  |                      |       |       | CACTCGC | 0.145  |
|                      |       |       | TA     | 0.418  |                      |       |       | CCTTCGC | 0.056  |
|                      |       |       | CG     | 0.475  |                      |       |       | CATGCGC | 0.360  |
| <i>Glyma10g11700</i> | MPW   | 0.336 | TG     | 0.407  | <i>Glyma13g30090</i> | MPH   | 0.139 | TC      | 0.114  |
|                      |       |       | GGC    | 0.418  |                      |       |       | GC      | 0.324  |
|                      |       |       | AGT    | 0.48   |                      |       |       | TT      | 0.278  |
|                      |       |       | GTC    | 0.408  |                      |       |       | GCCCT   | 0.120  |
| <i>Glyma16g03450</i> | MPW   | 0.456 | CTC    | 0.416  | <i>Glyma15g30265</i> | MPH   | 0.711 | AACTT   | 0.108  |
|                      |       |       | CCT    | 0.492  |                      |       |       | GCACT   | 0.175  |
|                      |       |       | ACC    | 0.459  |                      |       |       | GCCCC   | 0.055  |
|                      |       |       | CG     | 0.428  |                      |       |       | TG      | 0.171  |
| <i>Glyma16g27350</i> | MPW   | 0.004 | TA     | 0.316  | <i>Glyma16g32180</i> | MPH   | 0.010 | GG      | 0.071  |
|                      |       |       | T      | 0.420  |                      |       |       | GC      | -0.025 |
| <i>Glyma20g36580</i> | MPW   | 0.484 | G      | 0.369  | <i>Glyma18g52430</i> | MPH   | 0.849 | GG      | 0.123  |
|                      |       |       | AC     | 0.121  |                      |       |       | AA      | 0.090  |
| <i>Glyma01g34780</i> | MPH   | 0.813 | GT     | 0.101  | <i>Glyma19g35236</i> | MPH   | 0.124 | AG      | 0.075  |
|                      |       |       | A      | 0.128  |                      |       |       | C       | 0.124  |
| <i>Glyma01g39120</i> | MPH   | 0.307 | T      | 0.077  | <i>Glyma02g00371</i> | MPH   | 0.587 | A       | -0.106 |
|                      |       |       | AG     | 0.116  |                      |       |       | GG      | 0.156  |
|                      |       |       | GG     | 0.156  |                      |       |       | GA      | 0.100  |
|                      |       |       | GA     | 0.100  |                      |       |       |         |        |

**Table S6.** The GO functional classification of the candidate DT genes related to the two indicators.

| Class        | A        | S        | T        | D        | PM       | TF       | PK       | UF       | O        | No. |
|--------------|----------|----------|----------|----------|----------|----------|----------|----------|----------|-----|
| Whole        | 51(0.29) | 41(0.23) | 41(0.23) | 38(0.21) | 26(0.15) | 21(0.12) | 15(0.08) | 35(0.2)  | 22(0.12) | 177 |
| MPW          | 25(0.27) | 22(0.24) | 24(0.26) | 23(0.25) | 17(0.18) | 16(0.17) | 4(0.04)  | 12(0.13) | 11(0.12) | 92  |
| MPH          | 28(0.30) | 22(0.24) | 21(0.23) | 16(0.17) | 11(0.12) | 7(0.08)  | 11(0.12) | 23(0.25) | 11(0.12) | 92  |
| Shared       | 2(0.29)  | 3(0.43)  | 4(0.57)  | 1(0.14)  | 2(0.29)  | 2(0.29)  | 0(0.00)  | 0(0.00)  | 0(0.00)  | 7   |
| S-QTL-allele | 25(0.29) | 25(0.26) | 18(0.19) | 27(0.28) | 14(0.15) | 12(0.13) | 16(0.17) | 14(0.15) | 10(0.11) | 95  |

The data showed that the detected QTL/SNPLDB shared by two or more indicators has an annotated gene frequency distribution among the biological function categories similar to the distribution of the total annotated genes. It means all the biological function categories being necessary for drought tolerance. A, S, T, D, PM, TF, PK, UF and O, represent the nine biological categories of candidate genes, i.e. ABA responders, stress responders, transports, development factors, protein metabolism, transcription factors, protein kinases, unknown function and others, respectively. The number outside of the parentheses is the total number of genes, and the number in parentheses is its rate to the total number of genes. S-QTL-allele, the gene in the 58 deficient and 16 emerged QTL-alleles changed from LRS to RCS.

**Table S7.** Comparisons between DT mapping results from the present RTM-GWAS and those reported from linkage mapping.

| SNPLDB        | Position (bp)     | R <sup>2</sup> | Reported QTL          | Position (bp)     | Population |
|---------------|-------------------|----------------|-----------------------|-------------------|------------|
| Gm02_14594196 | 14594196          | 1.0            | RRL2.5                | 15084508-15269219 | 5          |
| Gm06_BLOCK172 | 15431276-15435935 | 1.0            | RRL6.3                | 16450669-16456975 | 5          |
| Gm06_BLOCK201 | 17499686-17547717 | 1.5            | RRL6.4                | 17458582-17605275 | 5          |
| Gm16_BLOCK395 | 35357235-35358822 | 1.6            | WUE 1-4               | 36641646-37139174 | 2          |
| Gm10_BLOCK159 | 12053290-12110973 | 2.5            | Drought index 1-10    | 11305953-12771348 | 1          |
|               |                   |                | Drought tolerance 6-3 | 12171935-43451323 | 3          |
| Gm20_BLOCK388 | 33593168-33630697 | 1.0            | RRL20.3               | 33980711          | 5          |
| Gm20_BLOCK429 | 36186946-36187233 | 1.0            | RRL20.4               | 35376980-35573994 | 5          |
| Gm01_BLOCK493 | 47264933-47293823 | 0.9            | Drought index 1-1     | 47892575-48314028 | 1          |
|               |                   |                | RSL1.1                | 47679785-47719340 | 5          |
| Gm02_161337   | 161337            | 0.4            | RRL2.1                | 475383-665256     | 5          |
| Gm03_326463   | 326463            | 0.4            | RSL3.1                | 345540-391133     | 5          |
| Gm04_BLOCK490 | 39059520-39224224 | 0.8            | RRL4.3                | 39024528-39224011 | 5          |
| Gm05_10333534 | 10333534          | 0.3            | Drought tolerance 6-2 | 2557874-32388406  | 3          |
| Gm05_18374832 | 18374832          | 0.4            | Drought tolerance 6-2 | 2557874-32388406  | 3          |
| Gm05_20554448 | 20554448          | 0.4            | Drought tolerance 6-2 | 2557874-32388406  | 3          |
| Gm05_33077723 | 33077723          | 0.2            | Drought index 1-7     | 34163842-35266095 | 1          |
| Gm06_BLOCK264 | 22103834-22103856 | 0.4            | RRL6.5                | 22700125-22889619 | 5          |
| Gm06_34868214 | 34868214          | 0.3            | Drought index 1-2     | 27940564-35215132 | 1          |
| Gm06_BLOCK522 | 45336128-45364730 | 0.8            | RSL6.2                | 44421459          | 5          |
| Gm07_3177189  | 3177189           | 0.7            | RSL7.1                | 3637584-3637602   | 5          |
| Gm07_BLOCK272 | 26276821-26276947 | 0.5            | RSL7.2                | 26650890-26840665 | 5          |
| Gm07_BLOCK373 | 36845443-36846591 | 0.3            | RRL7.1                | 37156574-37328831 | 5          |
| Gm07_42499533 | 42499533          | 0.5            | Drought index 1-6     | 40968705-43225732 | 1          |
| Gm08_BLOCK165 | 16183060-16183086 | 0.5            | RSL8.2                | 16514519          | 5          |
| Gm08_BLOCK527 | 44688033-44689115 | 0.7            | RRL8.5                | 44810051-44999995 | 5          |
| Gm09_BLOCK115 | 8621107-8819963   | 0.9            | RRL9.1                | 8307615-8338394   | 5          |
| Gm09_BLOCK142 | 11337674-11393438 | 0.7            | RSL9.2                | 11146429-11345432 | 5          |
| Gm09_41866356 | 41866356          | 0.2            | RSL9.3                | 42125408-42323074 | 5          |
| Gm12_BLOCK402 | 34418573-34433816 | 0.5            | Drought index 1-3     | 35107930-36042990 | 1          |
| Gm12_BLOCK429 | 36325875-36326233 | 0.8            | Drought tolerance 6-4 | 34693738-36615077 | 3          |
|               |                   |                | RRL12.1               | 36587265          | 5          |
| Gm14_3106285  | 3106285           | 0.2            | RSL14.1               | 4132705-4327965   | 5          |
| Gm16_2912151  | 2912151           | 0.2            | Drought index 1-5     | 1140933-1631658   | 1          |
| Gm18_26517331 | 26517331          | 0.3            | WUE 1-1               | 21357362-45919323 | 2          |
| Gm18_BLOCK434 | 39409732-39410305 | 0.4            | WUE 1-1               | 21357362-45919323 | 2          |
| Gm19_37391411 | 37391411          | 0.2            | RRL19.4               | 36520851-36592067 | 5          |
| Gm19_45043655 | 45043655          | 0.2            | RSL19.5               | 44377195-44558289 | 5          |
| Gm20_BLOCK468 | 38753573-38753583 | 0.2            | Drought index 1-4     | 37076339-38389840 | 1          |
| Gm20_BLOCK531 | 44594152-44673992 | 0.6            | RSL20.2               | 43939431-44098961 | 5          |
| Gm04_47582011 | 47582011          | 0.6            | WUE 2-2               | 43566128-44182293 | 4          |
|               |                   |                | WUE 2-3               | 43566128-44182293 | 4          |
| Gm19_46882319 | 46882319          | 0.3            | WUE 2-1               | 47049000-47258164 | 4          |

Reported: 1, 2, 3, 4 and 5 represent a SNPLBD located in the interval of a QTL detected in the populations of 'Kefeng 1 × Nannong 1138-2'<sup>1</sup>, 'Young × PI 416937'<sup>2</sup>, 'Benning × PI 416937'<sup>3</sup>, 'S100 × Tokyo'<sup>4</sup> and a nested association mapping (NAM) population<sup>5</sup> composed of 'M8206 × TongShan' and 'ZhengYang × M8206', respectively, which were reported in the literature.

**Table S8.** The 19 important and specific QTL/SNPLDB worth for further study.

|                                                                             | SNPLDB        | Candidate Gene       | Classification |        |   |   |    |    |    |    |   |
|-----------------------------------------------------------------------------|---------------|----------------------|----------------|--------|---|---|----|----|----|----|---|
|                                                                             |               |                      | ABA            | Stress | T | D | PM | TF | PK | UF | O |
| <b>Two shared LC-major QTL</b>                                              |               |                      |                |        |   |   |    |    |    |    |   |
| 1                                                                           | Gm06_BLOCK576 | <i>Glyma06g47300</i> |                | √      | √ |   |    |    |    |    |   |
| 2                                                                           | Gm08_BLOCK466 | <i>Glyma08g40360</i> |                | √      | √ |   |    |    |    |    |   |
|                                                                             |               | <i>Glyma08g40420</i> | √              |        |   |   |    |    | √  |    |   |
|                                                                             |               | <i>Glyma10g11720</i> |                |        |   | √ |    |    |    |    |   |
|                                                                             |               | <i>Glyma10g11775</i> | √              | √      |   |   |    |    | √  |    |   |
| <b>Two most significant QTL for each indicators</b>                         |               |                      |                |        |   |   |    |    |    |    |   |
| 3                                                                           | Gm13_BLOCK338 | <i>Glyma13g25290</i> |                |        |   |   |    |    |    |    | √ |
|                                                                             |               | <i>Glyma13g25350</i> | √              | √      |   |   |    |    |    |    |   |
|                                                                             |               | <i>Glyma13g25380</i> |                |        |   |   |    |    | √  |    |   |
|                                                                             |               | <i>Glyma13g25390</i> |                |        | √ | √ |    |    |    |    |   |
|                                                                             |               | <i>Glyma13g25420</i> | √              | √      |   |   |    |    |    |    |   |
| 4                                                                           | Gm07_BLOCK25  | <i>Glyma07g03770</i> |                |        |   |   |    |    |    |    | √ |
|                                                                             |               | <i>Glyma07g03780</i> | √              | √      | √ |   |    |    |    |    |   |
|                                                                             |               | <i>Glyma07g03790</i> |                |        |   |   |    |    |    |    | √ |
|                                                                             |               | <i>Glyma07g03800</i> |                |        |   |   |    |    |    |    | √ |
| <b>Five LC-major QTL repeatedly detected by linkage mapping</b>             |               |                      |                |        |   |   |    |    |    |    |   |
| 5                                                                           | Gm02_14594196 | <i>Glyma02g16170</i> |                |        |   |   |    |    |    |    | √ |
|                                                                             |               | <i>Glyma02g16181</i> |                |        |   |   |    |    |    |    | √ |
|                                                                             |               | <i>Glyma02g16200</i> | √              | √      | √ |   |    |    |    |    |   |
|                                                                             |               | <i>Glyma02g16220</i> |                |        |   |   |    |    |    |    | √ |
| 6                                                                           | Gm06_BLOCK172 | <i>Glyma06g19220</i> |                |        |   |   |    |    |    |    | √ |
| 7                                                                           | Gm06_BLOCK201 | <i>Glyma06g21050</i> |                |        |   |   |    |    |    |    | √ |
|                                                                             |               | <i>Glyma06g21080</i> |                |        |   |   |    |    |    |    | √ |
|                                                                             |               | <i>Glyma06g21090</i> |                |        |   |   |    | √  |    |    |   |
| 8                                                                           | Gm16_BLOCK395 | <i>Glyma16g32170</i> |                | √      |   |   |    |    |    |    |   |
|                                                                             |               | <i>Glyma16g32180</i> |                |        | √ |   |    |    |    |    |   |
| 9                                                                           | Gm10_BLOCK159 | <i>Glyma10g11700</i> |                |        |   |   |    |    |    |    | √ |
|                                                                             |               | <i>Glyma10g11706</i> |                |        |   | √ |    |    |    |    |   |
|                                                                             |               | <i>Glyma10g11720</i> |                |        |   | √ |    |    |    |    |   |
|                                                                             |               | <i>Glyma10g11775</i> | √              | √      |   |   |    |    | √  |    |   |
| <b>Three QTL with the strongest differentiation between the LRS and RCS</b> |               |                      |                |        |   |   |    |    |    |    |   |
| 10                                                                          | Gm11_BLOCK241 | <i>Glyma11g24236</i> |                |        |   |   |    |    |    |    | √ |
| 3                                                                           | Gm13_BLOCK338 |                      |                |        |   |   |    |    |    |    |   |
| <b>Twenty-four QTL with new allele emerged in RCS</b>                       |               |                      |                |        |   |   |    |    |    |    |   |
| 11                                                                          | Gm01_BLOCK493 | <i>Glyma01g34780</i> | √              |        |   | √ | √  |    |    | √  |   |
|                                                                             |               | <i>Glyma01g34800</i> | √              | √      |   |   |    |    |    |    |   |
|                                                                             |               | <i>Glyma01g34830</i> |                |        | √ | √ | √  |    |    |    |   |
| 12                                                                          | Gm04_BLOCK232 | <i>Glyma04g16805</i> |                | √      |   |   |    |    |    |    |   |
| 13                                                                          | Gm04_BLOCK490 | <i>Glyma04g33410</i> |                |        |   | √ |    |    | √  |    |   |
|                                                                             |               | <i>Glyma04g33540</i> |                |        |   |   |    |    |    |    | √ |
| 14                                                                          | Gm06_BLOCK522 | <i>Glyma06g42121</i> |                |        |   |   |    | √  |    |    |   |
| 1                                                                           | Gm06_BLOCK576 | <i>Glyma06g47300</i> |                | √      | √ |   |    |    |    |    |   |
| 15                                                                          | Gm09_BLOCK142 | <i>Glyma09g11360</i> |                |        | √ |   |    |    |    |    |   |
| 16                                                                          | Gm15_BLOCK409 | <i>Glyma15g32800</i> |                | √      |   |   | √  |    |    | √  |   |
| 17                                                                          | Gm19_42142070 | <i>Glyma19g34540</i> |                |        |   | √ |    |    |    |    |   |
| 18                                                                          | Gm19_BLOCK554 | <i>Glyma19g38890</i> |                |        |   |   | √  |    |    | √  |   |
| 19                                                                          | Gm20_39658098 | <i>Glyma20g30980</i> | √              | √      |   | √ |    |    | √  |    |   |
|                                                                             |               | <i>Glyma20g31015</i> |                |        |   | √ |    |    |    |    |   |

T, D, PM, TF, PK, UF and O, represent the seven biological categories of candidate genes, i.e. transports, development factors, protein metabolism, transcription factors, protein kinases, unknown function and others, respectively; LRS, landrace subpopulation; RCS released cultivar subpopulation.

**Table S9.** Comparison of the thorough RTM-GWAS results with these only for some major ones with conservative significance level.

| <b>Result</b>                    | <b>RTM-GWAS for Entire QTL</b> | <b>Regular Conservative GWAS for Major QTL</b> |
|----------------------------------|--------------------------------|------------------------------------------------|
| Number of QTL detected           | 135                            | 29                                             |
| Total contribution $R^2$         | $\approx 50.9\%$               | $\approx 25.3\%$                               |
| Number of shared QTL             | 4                              | 1                                              |
| Number of Alleles detected       | 454                            | 159                                            |
| Number of RT-qPCR-verified genes | 177                            | 69                                             |
